# Supplementary material for: The Effects of Marital Status, Fertility, and Bereavement on Adult Mortality in Polygamous and Monogamous Households: Evidence From the Utah Population Database
Source: Springer Nature journal article supplement (doi:10.1007/s13524-020-00918-z), 2020-09-15
Supplement: MOESM1 [file 18383122]

## **Online Appendix**

### **The Effects of Marital Status, Fertility, and Bereavement on Adult Mortality in Polygamous and Monogamous Households: Evidence From the Utah Population Database**

Kieron J. Barclay, Robyn Donrovich Thorén, Heidi A. Hanson, and Ken R. Smith

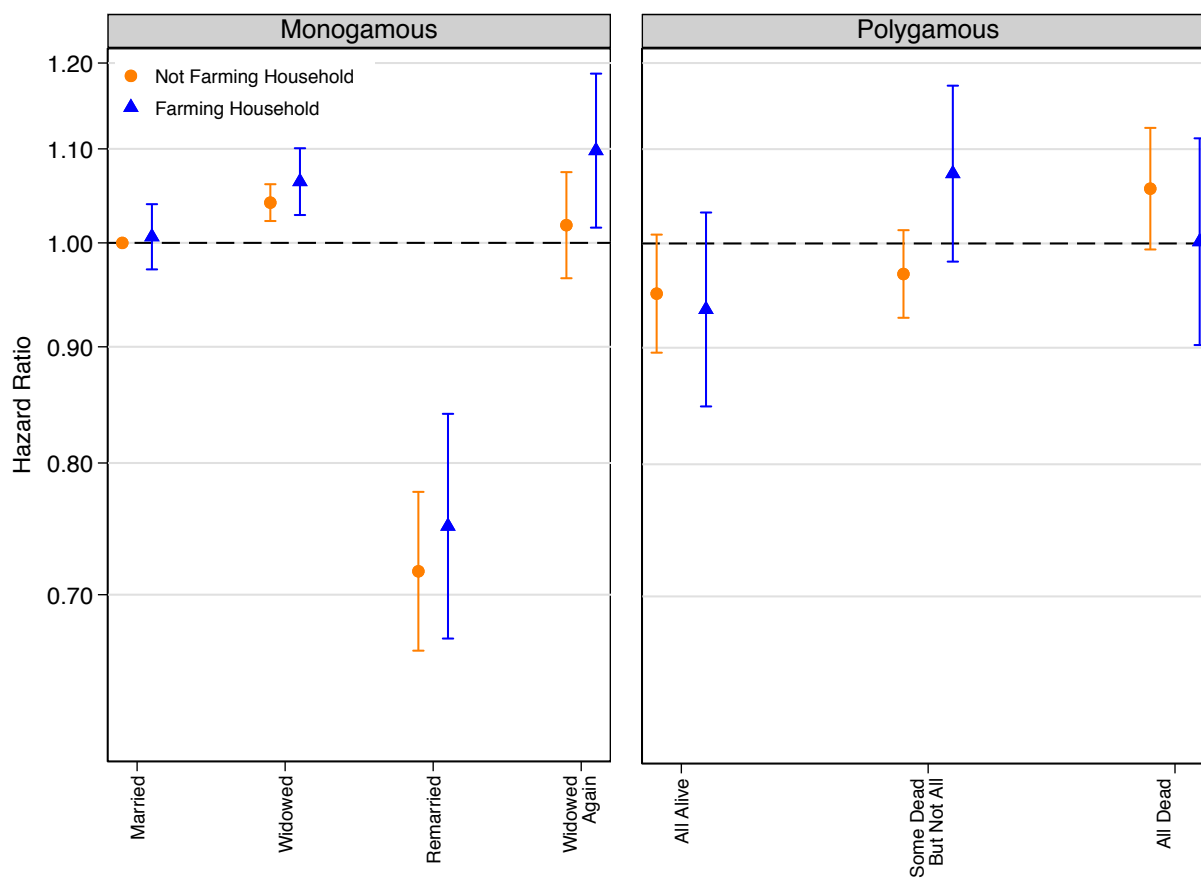

FIGURE S1. Multivariate estimates of mortality hazard for women: interaction between whether husband was a farmer and marital status of women. Error bars are 95% confidence intervals. Note that the estimates shown in the left and right panel are from the same model, where the common reference category is women in first monogamous marriages who have not been widowed. Estimates are based upon Model 4.

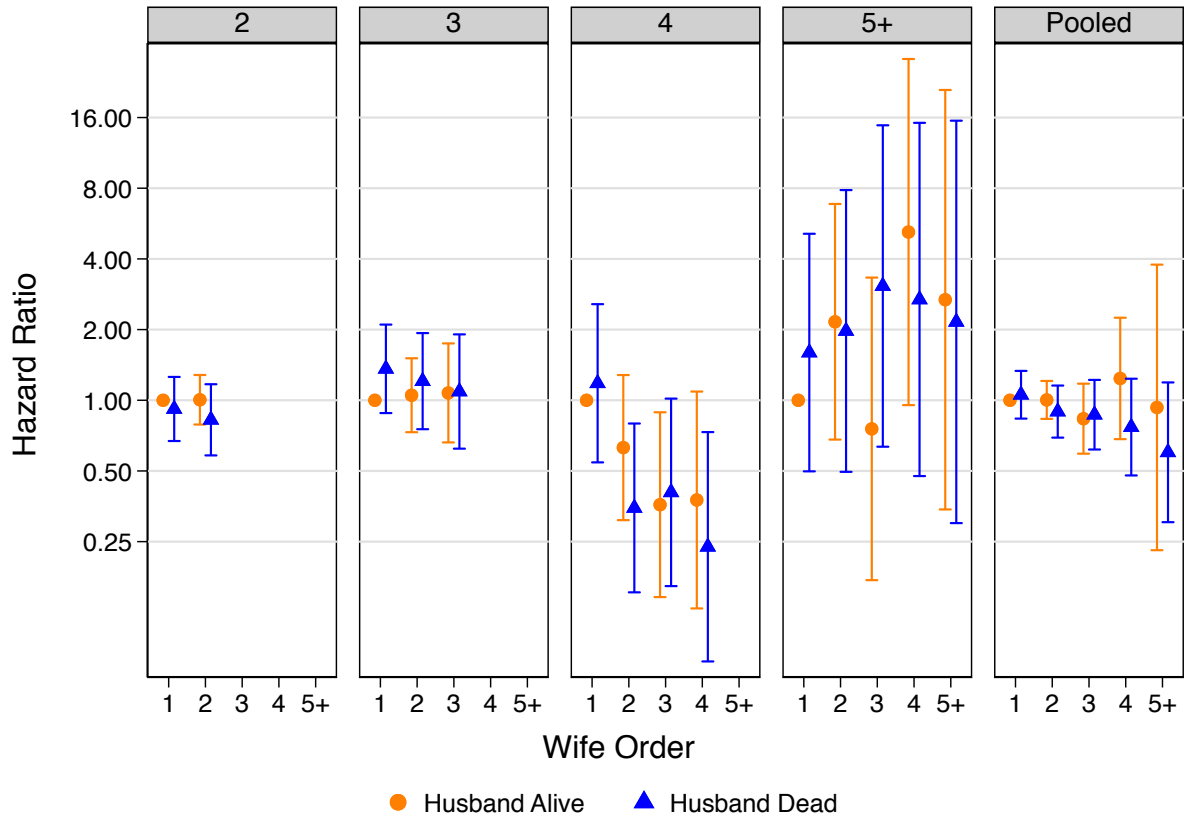

FIGURE S2. Interaction between marriage order of women in polygamous marriages and husband mortality, by marriage group size, applying husband fixed effects. Error bars are 95% confidence intervals. Each panel represents a separate analysis by completed marriage group size.

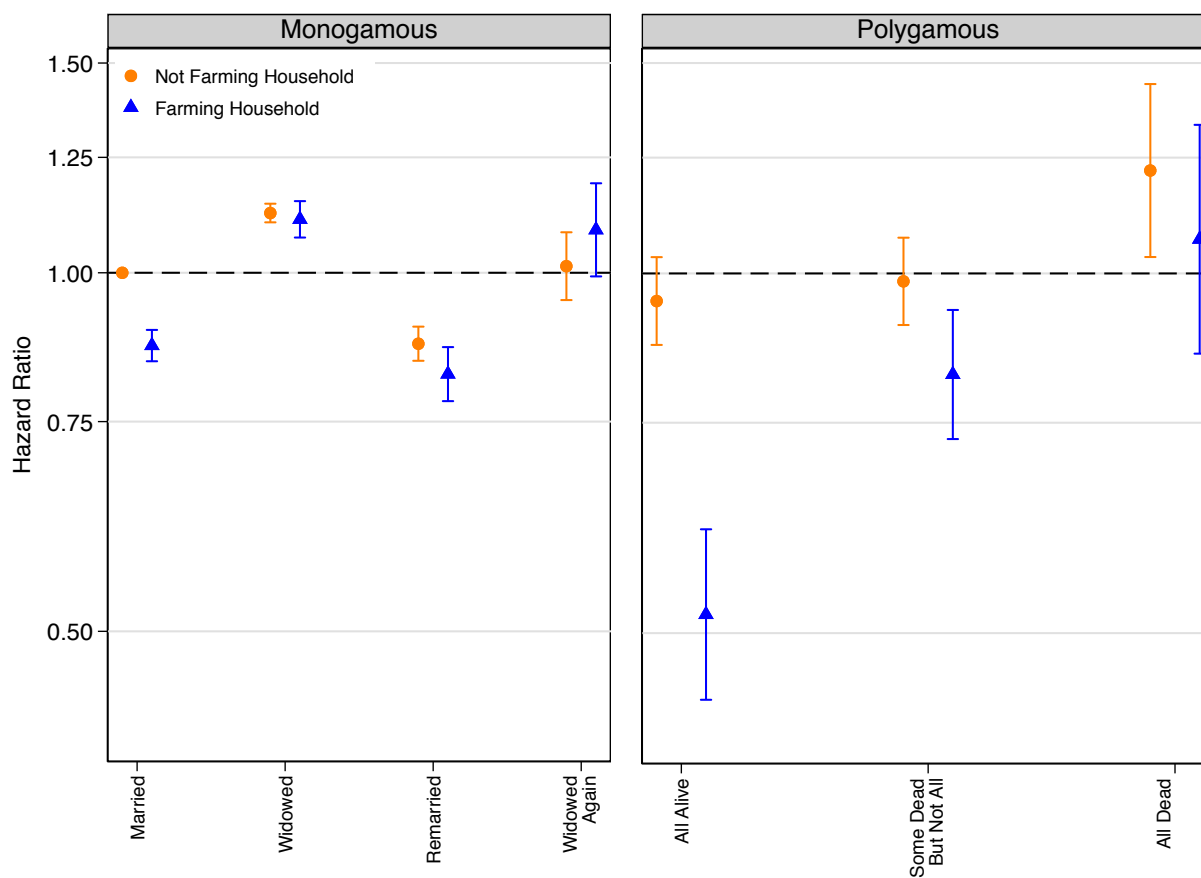

FIGURE S3. Multivariate estimates of mortality hazard for men: interaction between whether man was a farmer and marital status of men. Error bars are 95% confidence intervals. Note that the estimates shown in the left and right panel are from the same model, where the common reference category is men in first monogamous marriages who have not been widowed. Estimates are based on Model 12.

TABLE S1. Descriptive Statistics for Analytical Population: Women

|                                         |                                                             | Monogamous       |        |                          | Polygamous       |        |                          |      |
|-----------------------------------------|-------------------------------------------------------------|------------------|--------|--------------------------|------------------|--------|--------------------------|------|
|                                         |                                                             | Person-years (%) | Deaths | Rate (10 <sup>-2</sup> ) | Person-years (%) | Deaths | Rate (10 <sup>-2</sup> ) |      |
| Marital Status                          | Monogamous, first marriage                                  | 68.56            | 39,674 | 1.02                     |                  |        |                          |      |
|                                         | Monogamous, first widowhood                                 | 19.55            | 58,743 | 5.30                     |                  |        |                          |      |
|                                         | Monogamous, remarried                                       | 1.36             | 931    | 1.21                     |                  |        |                          |      |
|                                         | Monogamous, widowed again                                   | 0.64             | 2,252  | 6.24                     |                  |        |                          |      |
|                                         | Polygamous, 2 wives, husband and sister wife alive          |                  |        |                          | 1.80             | 1,011  | 0.99                     |      |
|                                         | Polygamous, 2 wives, husband alive, sister wife dead        |                  |        |                          | 0.22             | 251    | 2.02                     |      |
|                                         | Polygamous, 2 wives, husband dead, sister wife alive        |                  |        |                          | 0.35             | 750    | 3.80                     |      |
|                                         | Polygamous, 2 wives, husband dead, sister wife dead         |                  |        |                          | 0.27             | 1,166  | 7.60                     |      |
|                                         | Polygamous, 3 wives, husband and sister wives alive         |                  |        |                          | 0.73             | 392    | 0.95                     |      |
|                                         | Polygamous, 3 wives, husband alive, one sister wife dead    |                  |        |                          | 0.17             | 138    | 1.39                     |      |
|                                         | Polygamous, 3 wives, husband alive, two sister wives dead   |                  |        |                          | 0.02             | 28     | 3.08                     |      |
|                                         | Polygamous, 3 wives, husband dead, sister wives alive       |                  |        |                          | 0.17             | 318    | 3.37                     |      |
|                                         | Polygamous, 3 wives, husband dead, one sister wife dead     |                  |        |                          | 0.17             | 546    | 5.73                     |      |
|                                         | Polygamous, 3 wives, husband dead, two sister wives dead    |                  |        |                          | 0.07             | 304    | 8.08                     |      |
|                                         | Polygamous, 4+ wives, husband and sister wives alive        |                  |        |                          | 0.42             | 219    | 0.92                     |      |
|                                         | Polygamous, 4+ wives, husband alive, some sister wives dead |                  |        |                          | 0.21             | 184    | 1.55                     |      |
|                                         | Polygamous, 4+ wives, husband alive, all sister wives dead  |                  |        |                          | 0.00             | 4      | 4.96                     |      |
|                                         | Polygamous, 4+ wives, husband dead, all sister wives alive  |                  |        |                          | 0.09             | 128    | 2.40                     |      |
|                                         | Polygamous, 4+ wives, husband dead, some sister wives dead  |                  |        |                          | 0.24             | 701    | 5.08                     |      |
|                                         | Polygamous, 4+ wives, husband dead, all sister wives dead   |                  |        |                          | 0.02             | 104    | 12.05                    |      |
| Birth cohort                            | <1800                                                       | 0.54             | 659    | 2.16                     | 0.01             | 19     | 4.92                     |      |
|                                         | 1800-1809                                                   | 0.75             | 887    | 2.10                     | 0.03             | 74     | 3.78                     |      |
|                                         | 1810-1819                                                   | 1.28             | 1,553  | 2.14                     | 0.18             | 305    | 2.97                     |      |
|                                         | 1820-1829                                                   | 1.97             | 2,386  | 2.14                     | 0.50             | 700    | 2.49                     |      |
|                                         | 1830-1839                                                   | 2.78             | 3,297  | 2.09                     | 1.10             | 1,364  | 2.19                     |      |
|                                         | 1840-1849                                                   | 4.07             | 4,718  | 2.05                     | 1.15             | 1,449  | 2.22                     |      |
|                                         | 1850-1859                                                   | 7.24             | 8,395  | 2.05                     | 1.10             | 1,306  | 2.10                     |      |
|                                         | 1860-1869                                                   | 11.17            | 12,966 | 2.05                     | 0.67             | 788    | 2.07                     |      |
|                                         | 1870-1879                                                   | 15.21            | 17,617 | 2.04                     | 0.13             | 162    | 2.23                     |      |
|                                         | 1880-1889                                                   | 19.78            | 22,293 | 1.99                     | 0.07             | 69     | 1.87                     |      |
|                                         | 1890-1900                                                   | 25.34            | 26,829 | 1.87                     | 0.01             | 8      | 1.54                     |      |
|                                         | Church affiliation                                          | Not affiliated   | 14.56  | 14,333                   | 1.74             | 0.39   | 489                      | 2.21 |
|                                         |                                                             | Inactive         | 19.16  | 13,582                   | 1.25             | 0.27   | 269                      | 1.78 |
| Age difference between wife and husband | Active                                                      | 56.40            | 73,685 | 2.31                     | 4.28             | 5,486  | 2.26                     |      |
|                                         | < -9                                                        | 12.89            | 14,938 | 2.05                     | 2.72             | 3,164  | 2.06                     |      |
| Biological parity                       | -9 to -5                                                    | 26.28            | 29,174 | 1.96                     | 1.06             | 1,368  | 2.28                     |      |
|                                         | -4 to -1                                                    | 28.34            | 31,280 | 1.95                     | 0.64             | 898    | 2.49                     |      |
|                                         | -1 to 1                                                     | 17.49            | 19,755 | 1.99                     | 0.36             | 529    | 2.62                     |      |
|                                         | 1 to 4                                                      | 3.80             | 4,644  | 2.16                     | 0.11             | 167    | 2.78                     |      |
|                                         | 5 to 9                                                      | 1.09             | 1,470  | 2.38                     | 0.05             | 89     | 2.99                     |      |
|                                         | > 9                                                         | 0.18             | 272    | 2.74                     | 0.01             | 29     | 3.59                     |      |
|                                         | Missing                                                     | 0.06             | 67     | 2.14                     |                  |        | 0.00                     |      |
|                                         | 0                                                           | 8.68             | 7,954  | 1.62                     | 0.27             | 253    | 1.64                     |      |
| 1                                       | 8.82                                                        | 7,064            | 1.41   | 0.23                     | 168              | 1.28   |                          |      |
| 2                                       | 9.66                                                        | 8,346            | 1.52   | 0.28                     | 223              | 1.42   |                          |      |
| 3                                       | 9.96                                                        | 9,405            | 1.67   | 0.31                     | 286              | 1.60   |                          |      |
| 4                                       | 9.69                                                        | 10,139           | 1.85   | 0.35                     | 348              | 1.74   |                          |      |
| 5                                       | 8.74                                                        | 9,777            | 1.98   | 0.42                     | 466              | 1.94   |                          |      |
| 6                                       | 7.78                                                        | 9,441            | 2.14   | 0.45                     | 540              | 2.12   |                          |      |
| 7                                       | 6.65                                                        | 8,646            | 2.29   | 0.47                     | 594              | 2.25   |                          |      |
| 8                                       | 5.64                                                        | 7,792            | 2.44   | 0.47                     | 658              | 2.47   |                          |      |
| 9                                       | 4.74                                                        | 6,992            | 2.61   | 0.47                     | 691              | 2.57   |                          |      |
| 10+                                     | 9.76                                                        | 16,044           | 2.90   | 1.21                     | 2,017            | 2.95   |                          |      |
| Child deaths                            | 0                                                           | 53.46            | 44,114 | 1.46                     | 1.95             | 1,581  | 1.43                     |      |
|                                         | 1                                                           | 19.88            | 25,324 | 2.25                     | 1.15             | 1,266  | 1.94                     |      |
|                                         | 2                                                           | 9.17             | 15,032 | 2.90                     | 0.81             | 1,204  | 2.61                     |      |
|                                         | 3                                                           | 4.17             | 8,383  | 3.55                     | 0.48             | 876    | 3.22                     |      |
|                                         | 4                                                           | 1.91             | 4,482  | 4.13                     | 0.28             | 609    | 3.90                     |      |
|                                         | 5+                                                          | 1.53             | 4,265  | 4.92                     | 0.27             | 708    | 4.68                     |      |
| Born outside of Utah                    | No                                                          | 56.45            | 62,841 | 1.97                     | 1.12             | 1,311  | 2.07                     |      |
|                                         | Yes                                                         | 33.66            | 38,759 | 2.03                     | 3.83             | 4,933  | 2.28                     |      |
| Husband Nam-Powers score                | 1                                                           | 0.53             | 594    | 1.98                     | 0.00             | 5      | 2.92                     |      |
|                                         | 2                                                           | 1.43             | 1,629  | 2.01                     | 0.05             | 63     | 2.13                     |      |
|                                         | 3                                                           | 4.88             | 5,552  | 2.01                     | 0.08             | 94     | 2.13                     |      |
|                                         | 4                                                           | 2.17             | 2,458  | 2.00                     | 0.07             | 86     | 2.19                     |      |
|                                         | 5                                                           | 28.53            | 32,272 | 2.00                     | 1.27             | 1,592  | 2.21                     |      |
|                                         | 6                                                           | 4.69             | 5,205  | 1.96                     | 0.08             | 105    | 2.28                     |      |
|                                         | 7                                                           | 3.78             | 4,101  | 1.92                     | 0.14             | 177    | 2.22                     |      |
|                                         | 8                                                           | 5.58             | 6,046  | 1.91                     | 0.10             | 121    | 2.17                     |      |
|                                         | 9                                                           | 3.10             | 3,336  | 1.90                     | 0.06             | 69     | 2.10                     |      |
|                                         | 10                                                          | 2.16             | 2,313  | 1.89                     | 0.07             | 88     | 2.33                     |      |
|                                         | Missing                                                     | 33.26            | 38,092 | 2.02                     | 3.03             | 3,844  | 2.24                     |      |
| Husband farmer                          | No                                                          | 66.72            | 75,076 | 1.99                     | 3.83             | 4,845  | 2.23                     |      |
|                                         | Yes                                                         | 23.39            | 26,522 | 2.00                     | 1.12             | 1,399  | 2.21                     |      |
| Age at first marriage                   | 10-19                                                       | 31.93            | 34,535 | 1.91                     | 2.59             | 3,094  | 2.11                     |      |
|                                         | 20-24                                                       | 41.91            | 46,503 | 1.96                     | 1.59             | 2,030  | 2.25                     |      |
|                                         | 25-29                                                       | 11.59            | 13,829 | 2.11                     | 0.49             | 679    | 2.46                     |      |
|                                         | 30-34                                                       | 2.92             | 3,834  | 2.32                     | 0.18             | 262    | 2.54                     |      |
|                                         | 35-39                                                       | 1.00             | 1,446  | 2.55                     | 0.06             | 104    | 2.94                     |      |
|                                         | 40-44                                                       | 0.37             | 587    | 2.82                     | 0.02             | 39     | 3.47                     |      |
|                                         | 45-49                                                       | 0.19             | 352    | 3.28                     | 0.01             | 18     | 4.61                     |      |
|                                         | 50-54                                                       | 0.08             | 180    | 3.76                     | 0.00             | 10     | 4.09                     |      |
|                                         | 55-59                                                       | 0.05             | 132    | 4.25                     | 0.00             | 4      | 3.57                     |      |
|                                         | 60+                                                         | 0.06             | 202    | 5.75                     | 0.00             | 4      | 17.45                    |      |

TABLE S2. Descriptive Statistics for Analytical Population: Men

|                                         |                                        | Monogamous       |        |                    | Polygamous       |        |                    |
|-----------------------------------------|----------------------------------------|------------------|--------|--------------------|------------------|--------|--------------------|
|                                         |                                        | Person-years (%) | Deaths | Rate ( $10^{-2}$ ) | Person-years (%) | Deaths | Rate ( $10^{-2}$ ) |
| Marital status                          | Monogamous, first marriage             | 85.32            | 66,394 | 1.67               |                  |        |                    |
|                                         | Monogamous, first widowhood            | 8.21             | 27,219 | 7.14               |                  |        |                    |
|                                         | Monogamous, second marriage            | 4.14             | 5,531  | 2.88               |                  |        |                    |
|                                         | Monogamous, second widowhood           | 0.34             | 1,399  | 8.94               |                  |        |                    |
|                                         | Monogamous, third marriage             | 0.18             | 308    | 3.72               |                  |        |                    |
|                                         | Monogamous, third widowhood            | 0.02             | 98     | 9.50               |                  |        |                    |
|                                         | Polygamous, two wives, both alive      |                  |        |                    | 0.98             | 656    | 1.44               |
|                                         | Polygamous, two wives, one dead        |                  |        |                    | 0.25             | 530    | 4.47               |
|                                         | Polygamous, two wives, both dead       |                  |        |                    | 0.04             | 193    | 10.91              |
|                                         | Polygamous, three wives, all alive     |                  |        |                    | 0.17             | 135    | 1.70               |
|                                         | Polygamous, three wives, one dead      |                  |        |                    | 0.15             | 222    | 3.28               |
|                                         | Polygamous, three wives, two dead      |                  |        |                    | 0.05             | 143    | 5.93               |
|                                         | Polygamous, three wives, all dead      |                  |        |                    | 0.00             | 27     | 13.79              |
|                                         | Polygamous, four plus wives, all alive |                  |        |                    | 0.05             | 38     | 1.55               |
|                                         | Polygamous, four plus wives, one dead  |                  |        |                    | 0.06             | 74     | 2.83               |
|                                         | Polygamous, four plus wives, two dead  |                  |        |                    | 0.03             | 50     | 3.93               |
| Polygamous, four plus wives, three dead |                                        |                  |        | 0.01               | 38               | 6.97   |                    |
| Polygamous, four plus wives, all dead   |                                        |                  |        | 0.00               | 24               | 20.64  |                    |
| Birth cohort                            | <1800                                  | 0.59             | 639    | 2.34               | 0.00             | 8      | 6.12               |
|                                         | 1800-1809                              | 0.68             | 744    | 2.34               | 0.04             | 67     | 3.36               |
|                                         | 1810-1819                              | 1.23             | 1,287  | 2.25               | 0.15             | 212    | 3.01               |
|                                         | 1820-1829                              | 2.02             | 2,112  | 2.25               | 0.35             | 424    | 2.60               |
|                                         | 1830-1839                              | 3.08             | 3,101  | 2.17               | 0.45             | 538    | 2.56               |
|                                         | 1840-1849                              | 4.66             | 4,805  | 2.22               | 0.39             | 450    | 2.47               |
|                                         | 1850-1859                              | 8.69             | 8,884  | 2.20               | 0.30             | 318    | 2.28               |
|                                         | 1860-1869                              | 12.86            | 13,405 | 2.24               | 0.08             | 86     | 2.46               |
|                                         | 1870-1879                              | 16.85            | 17,847 | 2.28               | 0.02             | 24     | 2.22               |
|                                         | 1880-1889                              | 21.94            | 22,742 | 2.23               | 0.00             | 3      | 2.06               |
|                                         | 1890-1900                              | 25.59            | 25,383 | 2.13               | 0.00             |        | 0.00               |
| Church affiliation                      | Not affiliated                         | 19.20            | 18,523 | 2.08               | 0.05             | 51     | 2.26               |
|                                         | Inactive                               | 20.04            | 16,478 | 1.77               | 0.04             | 38     | 1.92               |
|                                         | Active                                 | 58.96            | 65,948 | 2.41               | 1.70             | 2,041  | 2.58               |
| Biological parity                       | 0                                      | 10.30            | 8,116  | 1.70               | 0.00             | 2      | 0.92               |
|                                         | 1                                      | 10.47            | 7,577  | 1.56               | 0.01             | 1      | 0.28               |
|                                         | 2                                      | 11.12            | 8,754  | 1.69               | 0.02             | 1      | 0.14               |
|                                         | 3                                      | 11.23            | 9,845  | 1.89               | 0.02             | 2      | 0.19               |
|                                         | 4                                      | 10.55            | 10,115 | 2.06               | 0.03             | 11     | 0.69               |
|                                         | 5                                      | 9.35             | 9,713  | 2.24               | 0.05             | 19     | 0.88               |
|                                         | 6                                      | 8.05             | 9,014  | 2.41               | 0.05             | 14     | 0.62               |
|                                         | 7                                      | 6.81             | 8,135  | 2.57               | 0.06             | 28     | 0.97               |
|                                         | 8                                      | 5.62             | 7,215  | 2.76               | 0.07             | 35     | 1.12               |
|                                         | 9                                      | 4.60             | 6,361  | 2.98               | 0.08             | 56     | 1.50               |
|                                         | 10                                     | 3.53             | 5,209  | 3.17               | 0.10             | 83     | 1.86               |
|                                         | 11-14                                  | 5.98             | 9,686  | 3.49               | 0.40             | 410    | 2.18               |
|                                         | 15-19                                  | 0.56             | 1,106  | 4.22               | 0.50             | 692    | 2.96               |
|                                         | 20+                                    | 0.04             | 103    | 5.03               | 0.40             | 776    | 4.16               |
| Child deaths                            | 0                                      | 60.77            | 48,600 | 1.72               | 0.28             | 111    | 0.84               |
|                                         | 1                                      | 20.94            | 24,851 | 2.55               | 0.30             | 175    | 1.25               |
|                                         | 2                                      | 9.17             | 13,370 | 3.14               | 0.32             | 297    | 2.02               |
|                                         | 3                                      | 4.03             | 7,036  | 3.76               | 0.26             | 327    | 2.75               |
|                                         | 4                                      | 1.88             | 3,689  | 4.22               | 0.20             | 282    | 3.07               |
|                                         | 5+                                     | 1.42             | 3,403  | 5.17               | 0.44             | 938    | 4.60               |
| Born outside of Utah                    | No                                     | 61.67            | 63,043 | 2.20               | 0.26             | 283    | 2.31               |
|                                         | Yes                                    | 36.54            | 37,906 | 2.23               | 1.53             | 1,847  | 2.60               |
| Nam-Powers occupational score           | 1                                      | 0.59             | 675    | 2.46               | 0.00             | 2      | 4.16               |
|                                         | 2                                      | 1.67             | 1,638  | 2.12               | 0.02             | 25     | 2.18               |
|                                         | 3                                      | 5.17             | 5,876  | 2.45               | 0.03             | 34     | 2.25               |
|                                         | 4                                      | 2.56             | 2,577  | 2.17               | 0.03             | 30     | 2.20               |
|                                         | 5                                      | 32.16            | 31,702 | 2.12               | 0.60             | 603    | 2.16               |
|                                         | 6                                      | 5.26             | 5,677  | 2.32               | 0.04             | 39     | 2.24               |
|                                         | 7                                      | 4.33             | 4,331  | 2.15               | 0.06             | 65     | 2.28               |
|                                         | 8                                      | 6.52             | 6,418  | 2.12               | 0.04             | 42     | 2.11               |
|                                         | 9                                      | 3.67             | 3,521  | 2.07               | 0.02             | 24     | 2.19               |
|                                         | 10                                     | 2.37             | 2,341  | 2.13               | 0.03             | 29     | 2.40               |
|                                         | Missing                                | 33.92            | 36,193 | 2.30               | 0.92             | 1,237  | 2.91               |
| Farmer                                  | No                                     | 72.06            | 75,351 | 2.25               | 1.26             | 1,595  | 2.72               |
|                                         | Yes                                    | 26.15            | 25,598 | 2.11               | 0.53             | 535    | 2.17               |
| Age at first marriage                   | 10-19                                  | 5.15             | 4,832  | 2.02               | 0.19             | 216    | 2.51               |
|                                         | 20-24                                  | 48.18            | 46,540 | 2.08               | 1.10             | 1,258  | 2.47               |
|                                         | 25-29                                  | 30.71            | 31,724 | 2.22               | 0.38             | 472    | 2.65               |
|                                         | 30-34                                  | 9.24             | 10,566 | 2.46               | 0.10             | 131    | 2.95               |
|                                         | 35-39                                  | 2.90             | 3,806  | 2.82               | 0.02             | 28     | 3.29               |
|                                         | 40-44                                  | 1.10             | 1,645  | 3.22               | 0.01             | 10     | 3.21               |
|                                         | 45-49                                  | 0.48             | 803    | 3.62               | 0.01             | 11     | 4.02               |
|                                         | 50-54                                  | 0.24             | 471    | 4.14               | 0.00             | 2      | 5.16               |
|                                         | 55-59                                  | 0.11             | 263    | 5.02               | 0.00             | 1      | 8.37               |
|                                         | 60+                                    | 0.09             | 299    | 7.47               | 0.00             | 1      | 79.06              |

TABLE S3. Multivariate estimates from Models 1 and 2 of mortality hazard for women using detailed marital status variable.

|                                         |                                                             | Model 1 |      |           | Model 2 |           |           |
|-----------------------------------------|-------------------------------------------------------------|---------|------|-----------|---------|-----------|-----------|
|                                         |                                                             | HR      | SE   | 95% CI    | HR      | SE        | 95% CI    |
| Marital status                          | Monogamous, first marriage (ref)                            | 1.00    |      |           | 1.00    |           |           |
|                                         | Monogamous, first widowhood                                 | 1.06    | 0.01 | 1.04-1.08 | 1.05    | 0.01      | 1.03-1.06 |
|                                         | Monogamous, remarried                                       | 0.73    | 0.02 | 0.68-0.78 | 0.73    | 0.02      | 0.68-0.78 |
|                                         | Monogamous, widowed again                                   | 1.06    | 0.02 | 1.01-1.11 | 1.04    | 0.02      | 1.00-1.09 |
|                                         | Polygamous, 2 wives, husband and sister wife alive          | 0.95    | 0.03 | 0.89-1.01 | 0.95    | 0.03      | 0.89-1.01 |
|                                         | Polygamous, 2 wives, husband alive, sister wife dead        | 1.02    | 0.07 | 0.90-1.16 | 1.01    | 0.06      | 0.89-1.15 |
|                                         | Polygamous, 2 wives, husband dead, sister wife alive        | 0.98    | 0.04 | 0.91-1.05 | 0.96    | 0.04      | 0.89-1.03 |
|                                         | Polygamous, 2 wives, husband dead, sister wife dead         | 1.06    | 0.03 | 1.00-1.13 | 1.04    | 0.03      | 0.98-1.11 |
|                                         | Polygamous, 3 wives, husband and sister wives alive         | 0.94    | 0.05 | 0.85-1.04 | 0.94    | 0.05      | 0.85-1.04 |
|                                         | Polygamous, 3 wives, husband alive, one sister wife dead    | 0.88    | 0.08 | 0.75-1.04 | 0.87    | 0.07      | 0.74-1.03 |
|                                         | Polygamous, 3 wives, husband alive, two sister wives dead   | 1.16    | 0.22 | 0.80-1.68 | 1.15    | 0.22      | 0.79-1.66 |
|                                         | Polygamous, 3 wives, husband dead, sister wives alive       | 1.03    | 0.06 | 0.92-1.15 | 1.01    | 0.06      | 0.90-1.13 |
|                                         | Polygamous, 3 wives, husband dead, one sister wife dead     | 1.12    | 0.05 | 1.02-1.22 | 1.09    | 0.05      | 1.00-1.18 |
|                                         | Polygamous, 3 wives, husband dead, two sister wives dead    | 1.06    | 0.06 | 0.94-1.19 | 1.03    | 0.06      | 0.92-1.15 |
|                                         | Polygamous, 4+ wives, husband and sister wives alive        | 0.95    | 0.06 | 0.83-1.08 | 0.94    | 0.06      | 0.83-1.08 |
|                                         | Polygamous, 4+ wives, husband alive, some sister wives dead | 1.01    | 0.08 | 0.87-1.17 | 1.01    | 0.07      | 0.87-1.16 |
|                                         | Polygamous, 4+ wives, husband alive, all sister wives dead  | 0.84    | 0.42 | 0.31-2.23 | 0.85    | 0.42      | 0.32-2.26 |
|                                         | Polygamous, 4+ wives, husband dead, all sister wives alive  | 0.98    | 0.09 | 0.82-1.16 | 0.96    | 0.09      | 0.81-1.14 |
|                                         | Polygamous, 4+ wives, husband dead, some sister wives dead  | 0.98    | 0.04 | 0.91-1.06 | 0.95    | 0.04      | 0.88-1.03 |
|                                         | Polygamous, 4+ wives, husband dead, all sister wives dead   | 1.13    | 0.11 | 0.93-1.37 | 1.11    | 0.11      | 0.91-1.35 |
| Birth cohort                            | <1800                                                       | 1.33    | 0.05 | 1.23-1.44 | 1.33    | 0.05      | 1.23-1.43 |
|                                         | 1800-1809                                                   | 1.25    | 0.04 | 1.17-1.33 | 1.23    | 0.04      | 1.15-1.32 |
|                                         | 1810-1819                                                   | 1.43    | 0.03 | 1.37-1.50 | 1.40    | 0.04      | 1.33-1.47 |
|                                         | 1820-1829                                                   | 1.39    | 0.03 | 1.33-1.44 | 1.36    | 0.03      | 1.30-1.41 |
|                                         | 1830-1839                                                   | 1.32    | 0.02 | 1.28-1.37 | 1.30    | 0.02      | 1.25-1.34 |
|                                         | 1840-1849                                                   | 1.29    | 0.02 | 1.26-1.33 | 1.27    | 0.02      | 1.23-1.31 |
|                                         | 1850-1859                                                   | 1.24    | 0.02 | 1.21-1.27 | 1.22    | 0.02      | 1.19-1.25 |
|                                         | 1860-1869                                                   | 1.20    | 0.01 | 1.17-1.22 | 1.17    | 0.01      | 1.15-1.20 |
|                                         | 1870-1879                                                   | 1.14    | 0.01 | 1.11-1.16 | 1.12    | 0.01      | 1.10-1.15 |
|                                         | 1880-1889 (ref)                                             | 1.00    |      |           | 1.00    |           |           |
|                                         | 1890-1900                                                   | 0.81    | 0.01 | 0.79-0.82 | 0.82    | 0.01      | 0.80-0.83 |
| Church affiliation                      | No affiliation (ref)                                        | 1.00    |      |           | 1.00    |           |           |
|                                         | Inactive                                                    | 0.90    | 0.01 | 0.88-0.93 | 0.89    | 0.01      | 0.87-0.91 |
|                                         | Active                                                      | 0.93    | 0.01 | 0.92-0.95 | 0.93    | 0.01      | 0.91-0.95 |
| Age difference between wife and husband | < -9                                                        |         |      |           | 1.01    | 0.01      | 0.99-1.03 |
|                                         | -9 to -5                                                    |         |      |           | 1.00    | 0.01      | 0.98-1.02 |
|                                         | -4 to -1                                                    |         |      |           | 1.00    | 0.01      | 0.98-1.02 |
|                                         | -1 to 1 (ref)                                               |         |      |           | 1.00    |           |           |
|                                         | 1 to 4                                                      |         |      |           | 1.02    | 0.02      | 0.99-1.05 |
|                                         | 5 to 9                                                      |         |      |           | 1.01    | 0.03      | 0.96-1.07 |
|                                         | > 9                                                         |         |      |           | 0.96    | 0.06      | 0.85-1.08 |
| Biological parity                       | Missing                                                     |         |      |           | 1.06    | 0.13      | 0.83-1.35 |
|                                         | 0 (ref)                                                     |         |      |           | 1.00    |           |           |
|                                         | 1                                                           |         |      |           | 0.91    | 0.02      | 0.88-0.94 |
|                                         | 2                                                           |         |      |           | 0.89    | 0.01      | 0.86-0.92 |
|                                         | 3                                                           |         |      |           | 0.87    | 0.01      | 0.84-0.89 |
|                                         | 4                                                           |         |      |           | 0.88    | 0.01      | 0.85-0.90 |
|                                         | 5                                                           |         |      |           | 0.85    | 0.01      | 0.83-0.88 |
|                                         | 6                                                           |         |      |           | 0.84    | 0.01      | 0.81-0.87 |
|                                         | 7                                                           |         |      |           | 0.85    | 0.01      | 0.82-0.88 |
|                                         | 8                                                           |         |      |           | 0.83    | 0.01      | 0.80-0.86 |
|                                         | 9                                                           |         |      |           | 0.83    | 0.02      | 0.80-0.86 |
| 10+                                     |                                                             |         |      | 0.82      | 0.01    | 0.80-0.85 |           |
| Child deaths                            | 0 (ref)                                                     |         |      |           | 1.00    |           |           |
|                                         | 1                                                           |         |      |           | 1.08    | 0.01      | 1.06-1.10 |
|                                         | 2                                                           |         |      |           | 1.14    | 0.01      | 1.11-1.16 |
|                                         | 3                                                           |         |      |           | 1.18    | 0.02      | 1.15-1.21 |
|                                         | 4                                                           |         |      |           | 1.21    | 0.02      | 1.18-1.25 |
| 5+                                      |                                                             |         |      | 1.22      | 0.02    | 1.18-1.26 |           |
| Born outside of Utah                    | No (ref)                                                    |         |      |           | 1.00    |           |           |
|                                         | Yes                                                         |         |      |           | 0.97    | 0.01      | 0.96-0.98 |
| Husband Nam-Powers score                | 1                                                           |         |      |           | 1.05    | 0.04      | 0.96-1.14 |
|                                         | 2                                                           |         |      |           | 1.01    | 0.03      | 0.96-1.07 |
|                                         | 3                                                           |         |      |           | 1.06    | 0.02      | 1.02-1.10 |
|                                         | 4                                                           |         |      |           | 1.03    | 0.02      | 0.98-1.08 |
|                                         | 5 (ref)                                                     |         |      |           | 1.00    |           |           |
|                                         | 6                                                           |         |      |           | 1.02    | 0.02      | 0.98-1.06 |
|                                         | 7                                                           |         |      |           | 0.94    | 0.02      | 0.90-0.98 |
|                                         | 8                                                           |         |      |           | 0.94    | 0.02      | 0.91-0.98 |
|                                         | 9                                                           |         |      |           | 0.90    | 0.02      | 0.87-0.94 |
|                                         | 10                                                          |         |      |           | 0.86    | 0.02      | 0.82-0.90 |
| Missing                                 |                                                             |         |      | 1.04      | 0.01    | 1.01-1.07 |           |
| Husband farmer                          | No (ref)                                                    |         |      |           | 1.00    |           |           |
|                                         | Yes                                                         |         |      |           | 1.02    | 0.01      | 0.99-1.05 |
| N                                       |                                                             | 110,890 |      |           | 110,890 |           |           |
| Deaths                                  |                                                             | 107,842 |      |           | 107,842 |           |           |

TABLE S4. Multivariate estimates from Models 1 and 2 of mortality hazard for women using simplified marital status variable.

|                                         |                                                | Model 1 |      |             | Model 2 |      |             |
|-----------------------------------------|------------------------------------------------|---------|------|-------------|---------|------|-------------|
|                                         |                                                | HR      | SE   | 95% CI      | HR      | SE   | 95% CI      |
| Marital status                          | Monogamous, first marriage (ref)               | 1.00    |      |             | 1.00    |      |             |
|                                         | Monogamous, first widowhood                    | 1.06    | 0.01 | 1.04 - 1.08 | 1.05    | 0.01 | 1.03 - 1.06 |
|                                         | Monogamous, remarried                          | 0.73    | 0.02 | 0.68 - 0.78 | 0.73    | 0.02 | 0.68 - 0.78 |
|                                         | Monogamous, widowed again                      | 1.06    | 0.02 | 1.01 - 1.11 | 1.04    | 0.02 | 1.00 - 1.09 |
|                                         | Polygamous, husband and all sister wives alive | 0.95    | 0.02 | 0.90 - 1.00 | 0.95    | 0.02 | 0.90 - 0.99 |
|                                         | Polygamous, some household members dead        | 1.01    | 0.02 | 0.97 - 1.05 | 0.99    | 0.02 | 0.95 - 1.03 |
|                                         | Polygamous, husband and all sister wives dead  | 1.06    | 0.03 | 1.01 - 1.12 | 1.04    | 0.03 | 0.99 - 1.10 |
| Birth cohort                            | <1800                                          | 1.33    | 0.05 | 1.23 - 1.44 | 1.33    | 0.05 | 1.23 - 1.43 |
|                                         | 1800-1809                                      | 1.25    | 0.04 | 1.17 - 1.33 | 1.23    | 0.04 | 1.15 - 1.31 |
|                                         | 1810-1819                                      | 1.43    | 0.03 | 1.37 - 1.50 | 1.40    | 0.04 | 1.33 - 1.47 |
|                                         | 1820-1829                                      | 1.39    | 0.03 | 1.33 - 1.44 | 1.36    | 0.03 | 1.30 - 1.41 |
|                                         | 1830-1839                                      | 1.32    | 0.02 | 1.28 - 1.37 | 1.30    | 0.02 | 1.25 - 1.34 |
|                                         | 1840-1849                                      | 1.29    | 0.02 | 1.26 - 1.33 | 1.27    | 0.02 | 1.23 - 1.31 |
|                                         | 1850-1859                                      | 1.24    | 0.02 | 1.21 - 1.27 | 1.22    | 0.02 | 1.19 - 1.25 |
|                                         | 1860-1869                                      | 1.20    | 0.01 | 1.17 - 1.22 | 1.18    | 0.01 | 1.15 - 1.20 |
|                                         | 1870-1879                                      | 1.14    | 0.01 | 1.11 - 1.16 | 1.12    | 0.01 | 1.10 - 1.15 |
|                                         | 1880-1889 (ref)                                | 1.00    |      |             | 1.00    |      |             |
|                                         | 1890-1900                                      | 0.81    | 0.01 | 0.79 - 0.82 | 0.82    | 0.01 | 0.80 - 0.83 |
| Church affiliation                      | No affiliation (ref)                           | 1.00    |      |             | 1.00    |      |             |
|                                         | Inactive                                       | 0.90    | 0.01 | 0.88 - 0.93 | 0.89    | 0.01 | 0.87 - 0.91 |
|                                         | Active                                         | 0.93    | 0.01 | 0.92 - 0.95 | 0.93    | 0.01 | 0.91 - 0.95 |
| Age difference between wife and husband | < -9                                           |         |      |             | 1.01    | 0.01 | 0.99 - 1.03 |
|                                         | -9 to -5                                       |         |      |             | 1.00    | 0.01 | 0.98 - 1.02 |
|                                         | -4 to -1                                       |         |      |             | 1.00    | 0.01 | 0.98 - 1.02 |
|                                         | -1 to 1 (ref)                                  |         |      |             | 1.00    |      |             |
|                                         | 1 to 4                                         |         |      |             | 1.02    | 0.02 | 0.99 - 1.05 |
|                                         | 5 to 9                                         |         |      |             | 1.01    | 0.03 | 0.96 - 1.07 |
|                                         | > 9                                            |         |      |             | 0.96    | 0.06 | 0.85 - 1.08 |
|                                         | Missing                                        |         |      |             | 1.06    | 0.13 | 0.83 - 1.35 |
| Biological parity                       | 0 (ref)                                        |         |      |             | 1.00    |      |             |
|                                         | 1                                              |         |      |             | 0.91    | 0.02 | 0.88 - 0.94 |
|                                         | 2                                              |         |      |             | 0.89    | 0.01 | 0.86 - 0.92 |
|                                         | 3                                              |         |      |             | 0.87    | 0.01 | 0.84 - 0.89 |
|                                         | 4                                              |         |      |             | 0.88    | 0.01 | 0.85 - 0.90 |
|                                         | 5                                              |         |      |             | 0.85    | 0.01 | 0.83 - 0.88 |
|                                         | 6                                              |         |      |             | 0.84    | 0.01 | 0.81 - 0.87 |
|                                         | 7                                              |         |      |             | 0.85    | 0.01 | 0.82 - 0.88 |
|                                         | 8                                              |         |      |             | 0.83    | 0.01 | 0.80 - 0.86 |
|                                         | 9                                              |         |      |             | 0.83    | 0.02 | 0.80 - 0.86 |
|                                         | 10+                                            |         |      |             | 0.82    | 0.01 | 0.80 - 0.85 |
| Child deaths                            | 0 (ref)                                        |         |      |             | 1.00    |      |             |
|                                         | 1                                              |         |      |             | 1.08    | 0.01 | 1.06 - 1.10 |
|                                         | 2                                              |         |      |             | 1.14    | 0.01 | 1.11 - 1.16 |
|                                         | 3                                              |         |      |             | 1.18    | 0.02 | 1.15 - 1.21 |
|                                         | 4                                              |         |      |             | 1.21    | 0.02 | 1.18 - 1.25 |
|                                         | 5+                                             |         |      |             | 1.22    | 0.02 | 1.18 - 1.26 |
| Born outside of Utah                    | No (ref)                                       |         |      |             | 1.00    |      |             |
|                                         | Yes                                            |         |      |             | 0.97    | 0.01 | 0.96 - 0.98 |
| Husband Nam-Powers score                | 1                                              |         |      |             | 1.05    | 0.04 | 0.96 - 1.14 |
|                                         | 2                                              |         |      |             | 1.01    | 0.03 | 0.96 - 1.07 |
|                                         | 3                                              |         |      |             | 1.06    | 0.02 | 1.02 - 1.10 |
|                                         | 4                                              |         |      |             | 1.03    | 0.02 | 0.98 - 1.08 |
|                                         | 5 (ref)                                        |         |      |             | 1.00    |      |             |
|                                         | 6                                              |         |      |             | 1.02    | 0.02 | 0.98 - 1.06 |
|                                         | 7                                              |         |      |             | 0.94    | 0.02 | 0.90 - 0.98 |
|                                         | 8                                              |         |      |             | 0.94    | 0.02 | 0.91 - 0.98 |
|                                         | 9                                              |         |      |             | 0.90    | 0.02 | 0.87 - 0.94 |
|                                         | 10                                             |         |      |             | 0.86    | 0.02 | 0.82 - 0.90 |
| Husband farmer                          | Missing                                        |         |      |             | 1.04    | 0.01 | 1.01 - 1.07 |
|                                         | No (ref)                                       |         |      |             | 1.00    |      |             |
|                                         | Yes                                            |         |      |             | 1.02    | 0.01 | 0.99 - 1.05 |
| N                                       |                                                | 110,890 |      |             | 110,890 |      |             |
| Deaths                                  |                                                | 107,842 |      |             | 107,842 |      |             |



Table S5: Multivariate estimates from Model 3 of mortality hazard for women using interaction between simplified marital status variable and number of child deaths.

|                                                           |                                                            | Model 3 |             |             |
|-----------------------------------------------------------|------------------------------------------------------------|---------|-------------|-------------|
|                                                           |                                                            | HR      | SE          | 95% CI      |
| Child deaths x Marital status                             | 0 Deaths & Monogamous, first marriage (ref)                | 1.00    |             |             |
|                                                           | 0 Deaths & Monogamous, first widowhood                     | 1.07    | 0.01        | 1.04 - 1.09 |
|                                                           | 0 Deaths & Monogamous, remarried                           | 0.68    | 0.04        | 0.62 - 0.76 |
|                                                           | 0 Deaths & Monogamous, widowed again                       | 1.04    | 0.04        | 0.96 - 1.12 |
|                                                           | 0 Deaths & Polygamous, husband and all sister wives alive  | 1.06    | 0.04        | 0.98 - 1.15 |
|                                                           | 0 Deaths & Polygamous, some household members dead         | 1.11    | 0.05        | 1.03 - 1.21 |
|                                                           | 0 Deaths & Polygamous, husband and all sister wives dead   | 1.18    | 0.07        | 1.04 - 1.33 |
|                                                           | 1 Death & Monogamous, first marriage                       | 1.10    | 0.01        | 1.07 - 1.13 |
|                                                           | 1 Death & Monogamous, first widowhood                      | 1.14    | 0.01        | 1.11 - 1.17 |
|                                                           | 1 Death & Monogamous, remarried                            | 0.86    | 0.05        | 0.76 - 0.97 |
|                                                           | 1 Death & Monogamous, widowed again                        | 1.15    | 0.05        | 1.06 - 1.25 |
|                                                           | 1 Death & Polygamous, husband and all sister wives alive   | 0.95    | 0.05        | 0.85 - 1.06 |
|                                                           | 1 Death & Polygamous, some household members dead          | 1.08    | 0.04        | 0.99 - 1.17 |
|                                                           | 1 Death & Polygamous, husband and all sister wives dead    | 1.09    | 0.07        | 0.97 - 1.23 |
|                                                           | 2+ Deaths & Monogamous, first marriage                     | 1.20    | 0.02        | 1.17 - 1.24 |
|                                                           | 2+ Deaths & Monogamous, first widowhood                    | 1.22    | 0.02        | 1.19 - 1.26 |
|                                                           | 2+ Deaths & Monogamous, remarried                          | 0.87    | 0.05        | 0.78 - 0.99 |
|                                                           | 2+ Deaths & Monogamous, widowed again                      | 1.23    | 0.04        | 1.15 - 1.32 |
|                                                           | 2+ Deaths & Polygamous, husband and all sister wives alive | 1.06    | 0.04        | 0.97 - 1.14 |
|                                                           | 2+ Deaths & Polygamous, some household members dead        | 1.12    | 0.03        | 1.07 - 1.19 |
| 2+ Deaths & Polygamous, husband and all sister wives dead | 1.21                                                       | 0.04    | 1.13 - 1.29 |             |
| Birth cohort                                              | <1800                                                      | 1.33    | 0.05        | 1.23 - 1.44 |
|                                                           | 1800-1809                                                  | 1.23    | 0.04        | 1.15 - 1.32 |
|                                                           | 1810-1819                                                  | 1.40    | 0.04        | 1.34 - 1.48 |
|                                                           | 1820-1829                                                  | 1.36    | 0.03        | 1.30 - 1.42 |
|                                                           | 1830-1839                                                  | 1.30    | 0.02        | 1.26 - 1.35 |
|                                                           | 1840-1849                                                  | 1.28    | 0.02        | 1.24 - 1.32 |
|                                                           | 1850-1859                                                  | 1.22    | 0.02        | 1.19 - 1.25 |
|                                                           | 1860-1869                                                  | 1.18    | 0.01        | 1.15 - 1.20 |
|                                                           | 1870-1879                                                  | 1.12    | 0.01        | 1.10 - 1.15 |
|                                                           | 1880-1889 (ref)                                            | 1.00    |             |             |
| 1890-1900                                                 | 0.82                                                       | 0.01    | 0.80 - 0.83 |             |
| Church affiliation                                        | No affiliation (ref)                                       | 1.00    |             |             |
|                                                           | Inactive                                                   | 0.89    | 0.01        | 0.87 - 0.91 |
|                                                           | Active                                                     | 0.93    | 0.01        | 0.91 - 0.95 |
| Age difference between wife and husband                   | < -9                                                       | 1.01    | 0.01        | 0.99 - 1.03 |
|                                                           | -9 to -5                                                   | 1.00    | 0.01        | 0.98 - 1.02 |
|                                                           | -4 to -1                                                   | 1.00    | 0.01        | 0.98 - 1.02 |
|                                                           | -1 to 1 (ref)                                              | 1.00    |             |             |
|                                                           | 1 to 4                                                     | 1.02    | 0.02        | 0.99 - 1.05 |
|                                                           | 5 to 9                                                     | 1.02    | 0.03        | 0.96 - 1.07 |
|                                                           | > 9                                                        | 0.96    | 0.06        | 0.85 - 1.08 |
|                                                           | Missing                                                    | 1.06    | 0.13        | 0.84 - 1.35 |
| Biological parity                                         | 0 (ref)                                                    | 1.00    |             |             |
|                                                           | 1                                                          | 0.91    | 0.02        | 0.88 - 0.94 |

*Continued on next page*

Table S5 – Continued from previous page

|                          |          | Model 3 |      |             |
|--------------------------|----------|---------|------|-------------|
|                          |          | HR      | SE   | 95% CI      |
|                          | 2        | 0.89    | 0.01 | 0.86 - 0.92 |
|                          | 3        | 0.87    | 0.01 | 0.84 - 0.89 |
|                          | 4        | 0.88    | 0.01 | 0.85 - 0.90 |
|                          | 5        | 0.85    | 0.01 | 0.82 - 0.88 |
|                          | 6        | 0.84    | 0.01 | 0.81 - 0.87 |
|                          | 7        | 0.85    | 0.01 | 0.82 - 0.88 |
|                          | 8        | 0.84    | 0.02 | 0.81 - 0.87 |
|                          | 9        | 0.83    | 0.02 | 0.80 - 0.86 |
|                          | 10+      | 0.84    | 0.01 | 0.81 - 0.86 |
| Born outside of Utah     | No (ref) | 1.00    |      |             |
|                          | Yes      | 0.97    | 0.01 | 0.96 - 0.98 |
| Husband Nam-Powers score | 1        | 1.05    | 0.05 | 0.96 - 1.14 |
|                          | 2        | 1.01    | 0.03 | 0.96 - 1.07 |
|                          | 3        | 1.06    | 0.02 | 1.02 - 1.10 |
|                          | 4        | 1.03    | 0.02 | 0.98 - 1.08 |
|                          | 5 (ref)  | 1.00    |      |             |
|                          | 6        | 1.02    | 0.02 | 0.98 - 1.06 |
|                          | 7        | 0.94    | 0.02 | 0.90 - 0.98 |
|                          | 8        | 0.94    | 0.02 | 0.91 - 0.98 |
|                          | 9        | 0.90    | 0.02 | 0.87 - 0.94 |
|                          | 10       | 0.86    | 0.02 | 0.82 - 0.90 |
|                          | Missing  | 1.04    | 0.01 | 1.01 - 1.07 |
| Husband farmer           | No (ref) | 1.00    |      |             |
|                          | Yes      | 1.02    | 0.01 | 0.99 - 1.05 |
| N                        |          |         |      | 110,890     |
| Deaths                   |          |         |      | 107,842     |

Table S6: Multivariate estimates from Model 4 of mortality hazard for women using interaction between simplified marital status variable and number of children ever born.

|                                                             |                                                             | Model 4 |           |           |
|-------------------------------------------------------------|-------------------------------------------------------------|---------|-----------|-----------|
|                                                             |                                                             | HR      | SE        | 95% CI    |
| Parity x Marital status                                     | Parity 0 & Monogamous, first marriage (ref)                 | 1.00    |           |           |
|                                                             | Parity 0 & Monogamous, first widowhood                      | 1.00    | 0.02      | 0.95-1.05 |
|                                                             | Parity 0 & Monogamous, remarried                            | 0.68    | 0.10      | 0.51-0.92 |
|                                                             | Parity 0 & Monogamous, widowed again                        | 0.90    | 0.10      | 0.73-1.11 |
|                                                             | Parity 0 & Polygamous, husband and all sister wives alive   | 1.01    | 0.11      | 0.83-1.24 |
|                                                             | Parity 0 & Polygamous, some household members dead          | 1.00    | 0.10      | 0.83-1.21 |
|                                                             | Parity 0 & Polygamous, husband and all sister wives dead    | 1.52    | 0.24      | 1.11-2.07 |
|                                                             | Parity 1-3 & Monogamous, first marriage                     | 0.86    | 0.02      | 0.82-0.89 |
|                                                             | Parity 1-3 & Monogamous, first widowhood                    | 0.91    | 0.02      | 0.87-0.95 |
|                                                             | Parity 1-3 & Monogamous, remarried                          | 0.61    | 0.04      | 0.53-0.70 |
|                                                             | Parity 1-3 & Monogamous, widowed again                      | 0.90    | 0.04      | 0.82-0.99 |
|                                                             | Parity 1-3 & Polygamous, husband and all sister wives alive | 0.92    | 0.06      | 0.81-1.05 |
|                                                             | Parity 1-3 & Polygamous, some household members dead        | 1.06    | 0.07      | 0.94-1.20 |
|                                                             | Parity 1-3 & Polygamous, husband and all sister wives dead  | 0.86    | 0.08      | 0.72-1.02 |
|                                                             | Parity 4-6 & Monogamous, first marriage                     | 0.84    | 0.02      | 0.80-0.87 |
|                                                             | Parity 4-6 & Monogamous, first widowhood                    | 0.88    | 0.02      | 0.85-0.92 |
|                                                             | Parity 4-6 & Monogamous, remarried                          | 0.58    | 0.04      | 0.52-0.66 |
|                                                             | Parity 4-6 & Monogamous, widowed again                      | 0.86    | 0.04      | 0.79-0.94 |
|                                                             | Parity 4-6 & Polygamous, husband and all sister wives alive | 0.77    | 0.04      | 0.69-0.86 |
|                                                             | Parity 4-6 & Polygamous, some household members dead        | 0.88    | 0.04      | 0.80-0.96 |
|                                                             | Parity 4-6 & Polygamous, husband and all sister wives dead  | 0.90    | 0.05      | 0.80-1.01 |
|                                                             | Parity 7-9 & Monogamous, first marriage                     | 0.83    | 0.02      | 0.79-0.86 |
|                                                             | Parity 7-9 & Monogamous, first widowhood                    | 0.86    | 0.02      | 0.82-0.90 |
|                                                             | Parity 7-9 & Monogamous, remarried                          | 0.64    | 0.04      | 0.56-0.73 |
|                                                             | Parity 7-9 & Monogamous, widowed again                      | 0.85    | 0.04      | 0.78-0.93 |
|                                                             | Parity 7-9 & Polygamous, husband and all sister wives alive | 0.78    | 0.04      | 0.70-0.86 |
|                                                             | Parity 7-9 & Polygamous, some household members dead        | 0.79    | 0.03      | 0.73-0.86 |
|                                                             | Parity 7-9 & Polygamous, husband and all sister wives dead  | 0.84    | 0.04      | 0.76-0.92 |
|                                                             | Parity 10+ & Monogamous, first marriage                     | 0.82    | 0.02      | 0.78-0.86 |
|                                                             | Parity 10+ & Monogamous, first widowhood                    | 0.85    | 0.02      | 0.81-0.89 |
|                                                             | Parity 10+ & Monogamous, remarried                          | 0.62    | 0.06      | 0.52-0.74 |
|                                                             | Parity 10+ & Monogamous, widowed again                      | 0.95    | 0.06      | 0.83-1.07 |
| Parity 10+ & Polygamous, husband and all sister wives alive | 0.73                                                        | 0.04    | 0.66-0.81 |           |
| Parity 10+ & Polygamous, some household members dead        | 0.75                                                        | 0.03    | 0.70-0.81 |           |
| Parity 10+ & Polygamous, husband and all sister wives dead  | 0.84                                                        | 0.04    | 0.76-0.92 |           |
| Birth cohort                                                | <1800                                                       | 1.32    | 0.05      | 1.22-1.43 |
|                                                             | 1800-1809                                                   | 1.22    | 0.04      | 1.15-1.31 |
|                                                             | 1810-1819                                                   | 1.39    | 0.04      | 1.32-1.46 |
|                                                             | 1820-1829                                                   | 1.35    | 0.03      | 1.29-1.41 |
|                                                             | 1830-1839                                                   | 1.29    | 0.02      | 1.25-1.34 |
|                                                             | 1840-1849                                                   | 1.27    | 0.02      | 1.23-1.31 |
|                                                             | 1850-1859                                                   | 1.21    | 0.02      | 1.18-1.24 |
|                                                             | 1860-1869                                                   | 1.17    | 0.01      | 1.15-1.20 |
|                                                             | 1870-1879                                                   | 1.12    | 0.01      | 1.10-1.14 |
| 1880-1889 (ref)                                             | 1.00                                                        |         |           |           |

*Continued on next page*

Table S6 – Continued from previous page

|                                            |                      | Model 4 |      |           |
|--------------------------------------------|----------------------|---------|------|-----------|
|                                            |                      | HR      | SE   | 95% CI    |
| Church affiliation                         | 1890-1900            | 0.82    | 0.01 | 0.80-0.83 |
|                                            | No affiliation (ref) | 1.00    |      |           |
| Age difference between<br>wife and husband | Inactive             | 0.89    | 0.01 | 0.87-0.91 |
|                                            | Active               | 0.93    | 0.01 | 0.91-0.94 |
|                                            | < -9                 | 1.01    | 0.01 | 0.99-1.03 |
|                                            | -9 to -5             | 1.00    | 0.01 | 0.98-1.02 |
|                                            | -4 to -1             | 1.00    | 0.01 | 0.98-1.02 |
|                                            | -1 to 1 (ref)        | 1.00    |      |           |
|                                            | 1 to 4               | 1.02    | 0.02 | 0.99-1.05 |
|                                            | 5 to 9               | 1.02    | 0.03 | 0.96-1.07 |
|                                            | > 9                  | 0.96    | 0.06 | 0.85-1.08 |
| Child deaths                               | Missing              | 1.06    | 0.13 | 0.84-1.35 |
|                                            | 0 (ref)              | 1.00    |      |           |
|                                            | 1                    | 1.07    | 0.01 | 1.06-1.09 |
|                                            | 2                    | 1.13    | 0.01 | 1.10-1.15 |
|                                            | 3                    | 1.17    | 0.02 | 1.14-1.20 |
|                                            | 4                    | 1.21    | 0.02 | 1.17-1.25 |
|                                            | 5+                   | 1.21    | 0.02 | 1.17-1.26 |
| Born outside of Utah                       | No (ref)             | 1.00    |      |           |
|                                            | Yes                  | 0.97    | 0.01 | 0.96-0.98 |
| Husband Nam-Powers<br>score                | 1                    | 1.04    | 0.04 | 0.96-1.14 |
|                                            | 2                    | 1.01    | 0.03 | 0.96-1.07 |
|                                            | 3                    | 1.06    | 0.02 | 1.02-1.10 |
|                                            | 4                    | 1.03    | 0.02 | 0.98-1.08 |
|                                            | 5 (ref)              | 1.00    |      |           |
|                                            | 6                    | 1.02    | 0.02 | 0.98-1.06 |
|                                            | 7                    | 0.94    | 0.02 | 0.90-0.98 |
|                                            | 8                    | 0.94    | 0.02 | 0.91-0.98 |
|                                            | 9                    | 0.90    | 0.02 | 0.87-0.94 |
|                                            | 10                   | 0.86    | 0.02 | 0.82-0.90 |
|                                            | Missing              | 1.04    | 0.01 | 1.01-1.07 |
| Husband farmer                             | No (ref)             | 1.00    |      |           |
|                                            | Yes                  | 1.02    | 0.01 | 0.99-1.04 |
| N                                          |                      |         |      | 110,890   |
| Deaths                                     |                      |         |      | 107,842   |

Table S7: Multivariate estimates from Model 5 of mortality hazard for women using interaction between simplified marital status variable and whether husband is a farmer

|                                         |                                                               | Model 5 |           |           |
|-----------------------------------------|---------------------------------------------------------------|---------|-----------|-----------|
|                                         |                                                               | HR      | SE        | 95% CI    |
| Husband farmer x Marital status         | Not a Farmer & Monogamous, first marriage                     | 1.00    |           |           |
|                                         | Not a Farmer & Monogamous, first widowhood                    | 1.04    | 0.01      | 1.02-1.06 |
|                                         | Not a Farmer & Monogamous, remarried                          | 0.72    | 0.03      | 0.66-0.78 |
|                                         | Not a Farmer & Monogamous, widowed again                      | 1.02    | 0.03      | 0.96-1.07 |
|                                         | Not a Farmer & Polygamous, husband and all sister wives alive | 0.95    | 0.03      | 0.90-1.01 |
|                                         | Not a Farmer & Polygamous, some household members dead        | 0.97    | 0.02      | 0.93-1.01 |
|                                         | Not a Farmer & Polygamous, husband and all sister wives dead  | 1.06    | 0.03      | 0.99-1.12 |
|                                         | Farmer & Monogamous, first marriage                           | 1.01    | 0.02      | 0.97-1.04 |
|                                         | Farmer & Monogamous, first widowhood                          | 1.06    | 0.02      | 1.03-1.10 |
|                                         | Farmer & Monogamous, remarried                                | 0.75    | 0.04      | 0.67-0.84 |
|                                         | Farmer & Monogamous, widowed again                            | 1.10    | 0.04      | 1.02-1.19 |
|                                         | Farmer & Polygamous, husband and all sister wives alive       | 0.94    | 0.05      | 0.85-1.03 |
|                                         | Farmer & Polygamous, some household members dead              | 1.07    | 0.05      | 0.98-1.17 |
|                                         | Farmer & Polygamous, husband and all sister wives dead        | 1.00    | 0.05      | 0.90-1.11 |
| Birth cohort                            | <1800                                                         | 1.33    | 0.05      | 1.23-1.43 |
|                                         | 1800-1809                                                     | 1.23    | 0.04      | 1.15-1.31 |
|                                         | 1810-1819                                                     | 1.40    | 0.04      | 1.33-1.47 |
|                                         | 1820-1829                                                     | 1.36    | 0.03      | 1.30-1.41 |
|                                         | 1830-1839                                                     | 1.30    | 0.02      | 1.25-1.34 |
|                                         | 1840-1849                                                     | 1.27    | 0.02      | 1.23-1.31 |
|                                         | 1850-1859                                                     | 1.22    | 0.02      | 1.19-1.25 |
|                                         | 1860-1869                                                     | 1.18    | 0.01      | 1.15-1.20 |
|                                         | 1870-1879                                                     | 1.12    | 0.01      | 1.10-1.15 |
|                                         | 1880-1889 (ref)                                               | 1.00    |           |           |
| 1890-1900                               | 0.82                                                          | 0.01    | 0.80-0.83 |           |
| Church affiliation                      | No affiliation (ref)                                          | 1.00    |           |           |
|                                         | Inactive                                                      | 0.89    | 0.01      | 0.87-0.91 |
|                                         | Active                                                        | 0.93    | 0.01      | 0.91-0.95 |
| Age difference between wife and husband | < -9                                                          | 1.01    | 0.01      | 0.99-1.03 |
|                                         | -9 to -5                                                      | 1.00    | 0.01      | 0.98-1.02 |
|                                         | -4 to -1                                                      | 1.00    | 0.01      | 0.98-1.02 |
|                                         | -1 to 1 (ref)                                                 | 1.00    |           |           |
|                                         | 1 to 4                                                        | 1.02    | 0.02      | 0.99-1.05 |
|                                         | 5 to 9                                                        | 1.02    | 0.03      | 0.96-1.07 |
|                                         | > 9                                                           | 0.96    | 0.06      | 0.85-1.08 |
|                                         | Missing                                                       | 1.06    | 0.13      | 0.83-1.35 |
| Biological parity                       | 0 (ref)                                                       | 1.00    |           |           |
|                                         | 1                                                             | 0.91    | 0.02      | 0.88-0.94 |
|                                         | 2                                                             | 0.89    | 0.01      | 0.86-0.92 |
|                                         | 3                                                             | 0.87    | 0.01      | 0.84-0.89 |
|                                         | 4                                                             | 0.88    | 0.01      | 0.85-0.90 |
|                                         | 5                                                             | 0.85    | 0.01      | 0.83-0.88 |
|                                         | 6                                                             | 0.84    | 0.01      | 0.81-0.87 |
|                                         | 7                                                             | 0.85    | 0.01      | 0.82-0.88 |
|                                         | 8                                                             | 0.83    | 0.01      | 0.80-0.86 |

*Continued on next page*

Table S7 – Continued from previous page

|                          |          | Model 5 |         |           |
|--------------------------|----------|---------|---------|-----------|
|                          |          | HR      | SE      | 95% CI    |
|                          | 9        | 0.83    | 0.02    | 0.80-0.86 |
|                          | 10+      | 0.82    | 0.01    | 0.80-0.85 |
| Child deaths             | 0 (ref)  | 1.00    |         |           |
|                          | 1        | 1.08    | 0.01    | 1.06-1.10 |
|                          | 2        | 1.14    | 0.01    | 1.11-1.16 |
|                          | 3        | 1.18    | 0.02    | 1.15-1.21 |
|                          | 4        | 1.21    | 0.02    | 1.17-1.25 |
|                          | 5+       | 1.22    | 0.02    | 1.18-1.26 |
| Born outside of Utah     | No (ref) | 1.00    |         |           |
|                          | Yes      | 0.97    | 0.01    | 0.96-0.98 |
| Husband Nam-Powers score | 1        | 1.05    | 0.04    | 0.96-1.14 |
|                          | 2        | 1.01    | 0.03    | 0.96-1.07 |
|                          | 3        | 1.06    | 0.02    | 1.02-1.10 |
|                          | 4        | 1.03    | 0.02    | 0.98-1.08 |
|                          | 5 (ref)  | 1.00    |         |           |
|                          | 6        | 1.02    | 0.02    | 0.98-1.06 |
|                          | 7        | 0.94    | 0.02    | 0.90-0.98 |
|                          | 8        | 0.94    | 0.02    | 0.91-0.98 |
|                          | 9        | 0.90    | 0.02    | 0.87-0.94 |
|                          | 10       | 0.86    | 0.02    | 0.82-0.90 |
|                          | Missing  | 1.04    | 0.01    | 1.01-1.07 |
| N                        |          |         | 110,890 |           |
| Deaths                   |          |         | 107,842 |           |

TABLE S8. Multivariate estimates from Model 6 of mortality hazard for women by marriage order using Cox proportional hazard model without stratifying on shared husband ID.

| Model 6                  |          |                   |       |            |                   |       |           |                   |      |            |                    |      |            |                        |       |            |
|--------------------------|----------|-------------------|-------|------------|-------------------|-------|-----------|-------------------|------|------------|--------------------|------|------------|------------------------|-------|------------|
|                          |          | Marriage size = 2 |       |            | Marriage size = 3 |       |           | Marriage size = 4 |      |            | Marriage size = 5+ |      |            | Marriage size = Pooled |       |            |
|                          |          | HR                | SE    | 95% CI     | HR                | SE    | 95% CI    | HR                | SE   | 95% CI     | HR                 | SE   | 95% CI     | HR                     | SE    | 95% CI     |
| Wife order               | 1 (ref)  | 1.00              |       |            | 1.00              |       |           | 1.00              |      |            | 1.00               |      |            | 1.00                   |       |            |
|                          | 2        | 1.14              | 0.05  | 1.04-1.24  | 0.95              | 0.08  | 0.81-1.12 | 1.04              | 0.18 | 0.74-1.47  | 1.84               | 0.52 | 1.05-3.21  | 1.07                   | 0.04  | 1.00-1.15  |
|                          | 3        |                   |       |            | 0.98              | 0.09  | 0.82-1.18 | 1.18              | 0.21 | 0.83-1.68  | 1.74               | 0.54 | 0.94-3.20  | 1.12                   | 0.06  | 1.01-1.25  |
|                          | 4        |                   |       |            |                   |       |           | 1.15              | 0.24 | 0.77-1.72  | 2.27               | 0.75 | 1.18-4.34  | 1.05                   | 0.10  | 0.87-1.28  |
|                          | 5        |                   |       |            |                   |       |           |                   |      |            | 1.75               | 0.60 | 0.89-3.43  | 0.76                   | 0.14  | 0.53-1.08  |
| Birth year               |          | 1.00              | 0.00  | 0.99-1.00  | 1.00              | 0.00  | 0.99-1.00 | 1.00              | 0.01 | 0.99-1.01  | 0.98               | 0.01 | 0.97-1.00  | 1.00                   | 0.00  | 1.00-1.00  |
| Husband dead             | No (ref) | 1.00              |       |            | 1.00              |       |           | 1.00              |      |            | 1.00               |      |            | 1.00                   |       |            |
|                          | Yes      | 1.07              | 0.06  | 0.96-1.20  | 1.23              | 0.11  | 1.02-1.47 | 1.07              | 0.21 | 0.73-1.58  | 1.02               | 0.32 | 0.56-1.88  | 1.10                   | 0.05  | 1.00-1.20  |
| Husband Nam-Powers score | 1        | 4.34              | 3.55  | 0.88-21.55 |                   |       |           |                   |      |            |                    |      |            | 4.61                   | 3.62  | 0.99-21.47 |
|                          | 2        | 1.10              | 0.24  | 0.71-1.69  | 0.76              | 0.26  | 0.40-1.48 | 0.79              | 0.42 | 0.28-2.24  |                    |      |            | 0.93                   | 0.16  | 0.67-1.29  |
|                          | 3        | 0.86              | 0.16  | 0.60-1.23  | 0.62              | 0.21  | 0.31-1.21 | 0.41              | 0.33 | 0.08-2.02  |                    |      |            | 0.77                   | 0.12  | 0.57-1.03  |
|                          | 4        | 0.94              | 0.19  | 0.63-1.40  | 1.11              | 0.44  | 0.51-2.41 | 1.01              | 0.73 | 0.25-4.15  | 4.33               | 2.43 | 1.45-12.98 | 1.04                   | 0.17  | 0.76-1.43  |
|                          | 5        | 1.00              |       |            | 1.00              |       |           | 1.00              |      |            | 1.00               |      |            | 1.00                   |       |            |
|                          | 6        | 1.00              | 0.18  | 0.70-1.44  | 0.97              | 0.28  | 0.54-1.71 |                   |      |            | 0.93               | 0.69 | 0.21-3.98  | 0.98                   | 0.15  | 0.74-1.32  |
|                          | 7        | 0.99              | 0.16  | 0.72-1.35  | 0.95              | 0.21  | 0.61-1.47 | 1.52              | 0.78 | 0.56-4.14  |                    |      |            | 1.01                   | 0.12  | 0.79-1.28  |
|                          | 8        | 0.82              | 0.15  | 0.57-1.19  | 0.98              | 0.26  | 0.58-1.66 | 2.16              | 1.16 | 0.75-6.17  | 1.36               | 0.81 | 0.42-4.38  | 0.93                   | 0.13  | 0.70-1.22  |
|                          | 9        | 0.86              | 0.19  | 0.55-1.33  | 0.55              | 0.20  | 0.28-1.11 | 6.08              | 4.37 | 1.49-24.86 | 0.56               | 0.39 | 0.14-2.19  | 0.79                   | 0.14  | 0.56-1.10  |
|                          | 10       | 0.65              | 0.14  | 0.42-0.99  | 1.77              | 0.59  | 0.92-3.41 | 2.98              | 1.61 | 1.03-8.60  | 0.80               | 0.47 | 0.25-2.52  | 0.76                   | 0.12  | 0.55-1.03  |
| Husband farmer           | Missing  | 1.00              | 0.12  | 0.79-1.27  | 0.85              | 0.15  | 0.60-1.19 | 1.06              | 0.38 | 0.53-2.14  | 1.26               | 0.46 | 0.62-2.57  | 0.94                   | 0.09  | 0.78-1.13  |
|                          | No       | 1.00              |       |            | 1.00              |       |           | 1.00              |      |            | 1.00               |      |            | 1.00                   |       |            |
|                          | Yes      | 0.97              | 0.12  | 0.77-1.23  | 0.88              | 0.16  | 0.62-1.26 | 1.00              | 0.38 | 0.47-2.11  |                    |      |            | 0.94                   | 0.09  | 0.78-1.14  |
| N                        |          |                   | 2,704 |            |                   | 1,182 |           |                   | 378  |            |                    | 193  |            |                        | 4,457 |            |
| Deaths                   |          |                   | 2,668 |            |                   | 1,160 |           |                   | 371  |            |                    | 187  |            |                        | 4,386 |            |

TABLE S9. Multivariate estimates from Model 7 of mortality hazard for women by marriage order using Cox proportional hazard model stratifying on shared husband ID.

|                       | Model 7           |       |        |                   |       |           |                   |      |           |                    |      |           |                        |       |           |           |
|-----------------------|-------------------|-------|--------|-------------------|-------|-----------|-------------------|------|-----------|--------------------|------|-----------|------------------------|-------|-----------|-----------|
|                       | Marriage size = 2 |       |        | Marriage size = 3 |       |           | Marriage size = 4 |      |           | Marriage size = 5+ |      |           | Marriage size = Pooled |       |           |           |
|                       | HR                | SE    | 95% CI | HR                | SE    | 95% CI    | HR                | SE   | 95% CI    | HR                 | SE   | 95% CI    | HR                     | SE    | 95% CI    |           |
| Wife order            | 1 (ref)           | 1.00  |        | 1.00              |       |           | 1.00              |      |           | 1.00               |      |           | 1.00                   |       |           |           |
|                       | 2                 | 0.96  | 0.11   | 0.77-1.19         | 0.99  | 0.15      | 0.73-1.32         | 0.44 | 0.13      | 0.25-0.80          | 1.56 | 0.63      | 0.71-3.44              | 0.93  | 0.08      | 0.79-1.09 |
|                       | 3                 |       |        | 0.93              | 0.20  | 0.61-1.41 | 0.41              | 0.15 | 0.20-0.86 | 1.46               | 0.78 | 0.51-4.14 | 0.86                   | 0.12  | 0.66-1.11 |           |
|                       | 4                 |       |        |                   |       |           | 0.29              | 0.14 | 0.11-0.73 | 2.22               | 1.43 | 0.63-7.83 | 0.88                   | 0.18  | 0.59-1.30 |           |
|                       | 5                 |       |        |                   |       |           |                   |      |           | 1.62               | 1.24 | 0.36-7.25 | 0.64                   | 0.20  | 0.35-1.19 |           |
| Age at first marriage |                   | 1.10  | 0.02   | 1.07-1.13         | 1.09  | 0.02      | 1.05-1.12         | 1.16 | 0.03      | 1.10-1.22          | 1.14 | 0.05      | 1.05-1.23              | 1.10  | 0.01      | 1.08-1.12 |
| Birth year            |                   | 1.02  | 0.01   | 1.00-1.04         | 1.00  | 0.01      | 0.98-1.03         | 1.06 | 0.02      | 1.02-1.11          | 0.98 | 0.03      | 0.92-1.04              | 1.01  | 0.01      | 1.00-1.03 |
| Husband dead          | No (ref)          | 1.00  |        |                   | 1.00  |           |                   | 1.00 |           |                    | 1.00 |           |                        | 1.00  |           |           |
|                       | Yes               | 0.86  | 0.12   | 0.65-1.15         | 1.19  | 0.22      | 0.83-1.72         | 0.88 | 0.27      | 0.49-1.59          | 1.25 | 0.58      | 0.25-0.80              | 0.97  | 0.10      | 0.25-0.80 |
| N                     |                   | 2,704 |        |                   | 1,182 |           |                   | 378  |           |                    | 193  |           |                        | 4,457 |           |           |
| Deaths                |                   | 2,668 |        |                   | 1,160 |           |                   | 371  |           |                    | 187  |           |                        | 4,386 |           |           |





TABLE S11. Multivariate estimates from Models 8 and 9 of mortality hazard for men using detailed marital status variable.

|                                       |                                         | Model 8 |           |           | Model 9 |           |           |
|---------------------------------------|-----------------------------------------|---------|-----------|-----------|---------|-----------|-----------|
|                                       |                                         | HR      | SE        | 95% CI    | HR      | SE        | 95% CI    |
| Marital status                        | Monogamous, first marriage (ref)        | 1.00    |           |           | 1.00    |           |           |
|                                       | Monogamous, first widowhood             | 1.17    | 0.01      | 1.15-1.19 | 1.16    | 0.01      | 1.14-1.18 |
|                                       | Monogamous, second marriage             | 0.89    | 0.01      | 0.86-0.91 | 0.90    | 0.01      | 0.87-0.92 |
|                                       | Monogamous, second widowhood            | 1.09    | 0.03      | 1.03-1.15 | 1.09    | 0.03      | 1.03-1.15 |
|                                       | Monogamous, third marriage              | 0.79    | 0.05      | 0.71-0.88 | 0.80    | 0.05      | 0.71-0.89 |
|                                       | Monogamous, third widowhood             | 0.92    | 0.09      | 0.76-1.13 | 0.92    | 0.09      | 0.75-1.12 |
|                                       | Polygamous, two wives, both alive       | 0.85    | 0.03      | 0.79-0.92 | 0.85    | 0.04      | 0.78-0.92 |
|                                       | Polygamous, two wives, one dead         | 0.98    | 0.04      | 0.90-1.07 | 0.96    | 0.05      | 0.88-1.06 |
|                                       | Polygamous, two wives, both dead        | 1.20    | 0.09      | 1.04-1.38 | 1.17    | 0.09      | 1.01-1.36 |
|                                       | Polygamous, three wives, all alive      | 0.92    | 0.08      | 0.77-1.09 | 0.90    | 0.08      | 0.75-1.07 |
|                                       | Polygamous, three wives, one dead       | 1.07    | 0.07      | 0.94-1.23 | 1.05    | 0.08      | 0.92-1.21 |
|                                       | Polygamous, three wives, two dead       | 1.04    | 0.09      | 0.88-1.22 | 1.00    | 0.09      | 0.85-1.19 |
|                                       | Polygamous, three wives, all dead       | 1.52    | 0.29      | 1.04-2.23 | 1.52    | 0.30      | 1.03-2.23 |
|                                       | Polygamous, four plus wives, all alive  | 0.76    | 0.12      | 0.55-1.05 | 0.74    | 0.12      | 0.53-1.02 |
|                                       | Polygamous, four plus wives, one dead   | 0.92    | 0.11      | 0.73-1.15 | 0.89    | 0.11      | 0.70-1.13 |
|                                       | Polygamous, four plus wives, two dead   | 0.88    | 0.12      | 0.67-1.16 | 0.84    | 0.12      | 0.63-1.12 |
|                                       | Polygamous, four plus wives, three dead | 0.81    | 0.13      | 0.59-1.12 | 0.78    | 0.13      | 0.57-1.09 |
| Polygamous, four plus wives, all dead | 1.28                                    | 0.26    | 0.86-1.92 | 1.28      | 0.27    | 0.85-1.93 |           |
| Birth cohort                          | <1800                                   | 1.03    | 0.04      | 0.95-1.11 | 0.98    | 0.04      | 0.90-1.06 |
|                                       | 1800-1809                               | 1.13    | 0.04      | 1.05-1.21 | 1.06    | 0.04      | 0.98-1.14 |
|                                       | 1810-1819                               | 1.08    | 0.03      | 1.03-1.14 | 1.03    | 0.03      | 0.98-1.09 |
|                                       | 1820-1829                               | 1.06    | 0.02      | 1.02-1.11 | 1.07    | 0.02      | 1.02-1.12 |
|                                       | 1830-1839                               | 1.04    | 0.02      | 1.00-1.07 | 1.09    | 0.02      | 1.05-1.13 |
|                                       | 1840-1849                               | 1.06    | 0.02      | 1.02-1.09 | 1.12    | 0.02      | 1.08-1.15 |
|                                       | 1850-1859                               | 1.04    | 0.01      | 1.01-1.06 | 1.06    | 0.01      | 1.03-1.09 |
|                                       | 1860-1869                               | 1.02    | 0.01      | 1.00-1.04 | 1.03    | 0.01      | 1.00-1.05 |
|                                       | 1870-1879                               | 1.06    | 0.01      | 1.04-1.08 | 1.05    | 0.01      | 1.03-1.07 |
|                                       | 1880-1889 (ref)                         | 1.00    |           |           | 1.00    |           |           |
|                                       | 1890-1900                               | 0.87    | 0.01      | 0.85-0.88 | 0.87    | 0.01      | 0.85-0.88 |
| Church affiliation                    | No affiliation (ref)                    | 1.00    |           |           | 1.00    |           |           |
|                                       | Inactive                                | 1.00    | 0.01      | 0.98-1.03 | 1.00    | 0.01      | 0.98-1.02 |
|                                       | Active                                  | 0.81    | 0.01      | 0.80-0.82 | 0.83    | 0.01      | 0.82-0.85 |
| Biological parity                     | 0 (ref)                                 |         |           |           | 1.00    |           |           |
|                                       | 1                                       |         |           |           | 0.95    | 0.02      | 0.92-0.98 |
|                                       | 2                                       |         |           |           | 0.94    | 0.01      | 0.91-0.97 |
|                                       | 3                                       |         |           |           | 0.91    | 0.01      | 0.88-0.94 |
|                                       | 4                                       |         |           |           | 0.90    | 0.01      | 0.87-0.93 |
|                                       | 5                                       |         |           |           | 0.88    | 0.01      | 0.85-0.90 |
|                                       | 6                                       |         |           |           | 0.87    | 0.01      | 0.84-0.90 |
|                                       | 7                                       |         |           |           | 0.85    | 0.01      | 0.82-0.88 |
|                                       | 8                                       |         |           |           | 0.85    | 0.02      | 0.83-0.89 |
|                                       | 9                                       |         |           |           | 0.85    | 0.02      | 0.82-0.89 |
|                                       | 10                                      |         |           |           | 0.86    | 0.02      | 0.82-0.89 |
|                                       | 11-14                                   |         |           |           | 0.83    | 0.02      | 0.80-0.86 |
|                                       | 15-19                                   |         |           |           | 0.81    | 0.03      | 0.76-0.86 |
|                                       | 20+                                     |         |           |           | 0.82    | 0.04      | 0.74-0.90 |
| Child deaths (ref)                    | 0                                       |         |           |           | 1.00    |           |           |
|                                       | 1                                       |         |           |           | 1.06    | 0.01      | 1.04-1.08 |
|                                       | 2                                       |         |           |           | 1.10    | 0.01      | 1.07-1.12 |
|                                       | 3                                       |         |           |           | 1.12    | 0.02      | 1.09-1.15 |
|                                       | 4                                       |         |           |           | 1.11    | 0.02      | 1.08-1.16 |
|                                       | 5+                                      |         |           |           | 1.24    | 0.02      | 1.19-1.29 |
| Born outside of Utah                  | No (ref)                                |         |           |           | 1.00    |           |           |
|                                       | Yes                                     |         |           |           | 0.92    | 0.01      | 0.91-0.93 |
| Nam-Powers occupational score         | 1                                       |         |           |           | 1.15    | 0.05      | 1.06-1.24 |
|                                       | 2                                       |         |           |           | 0.83    | 0.02      | 0.79-0.88 |
|                                       | 3                                       |         |           |           | 1.09    | 0.02      | 1.05-1.13 |
|                                       | 4                                       |         |           |           | 0.87    | 0.02      | 0.83-0.91 |
|                                       | 5 (ref)                                 |         |           |           | 0.89    | 0.02      | 0.86-0.92 |
|                                       | 6                                       |         |           |           | 1.00    |           |           |
|                                       | 7                                       |         |           |           | 0.85    | 0.02      | 0.82-0.89 |
|                                       | 8                                       |         |           |           | 0.81    | 0.01      | 0.78-0.84 |
|                                       | 9                                       |         |           |           | 0.78    | 0.02      | 0.75-0.81 |
|                                       | 10                                      |         |           |           | 0.77    | 0.02      | 0.73-0.81 |
| Farmer                                | Missing                                 |         |           |           | 1.04    | 0.01      | 1.01-1.07 |
|                                       | No (ref)                                |         |           |           | 1.00    |           |           |
|                                       | Yes                                     |         |           |           | 0.91    | 0.01      | 0.88-0.93 |
| N                                     |                                         | 106,979 |           |           | 106,979 |           |           |
| Deaths                                |                                         | 103,079 |           |           | 103,079 |           |           |

TABLE S12. Multivariate estimates from Models 8 and 9 of mortality hazard for men using simplified marital status variable.

|                               |                                                | Model 8              |      |           | Model 9 |      |           |
|-------------------------------|------------------------------------------------|----------------------|------|-----------|---------|------|-----------|
|                               |                                                | HR                   | SE   | 95% CI    | HR      | SE   | 95% CI    |
| Marital status                | Monogamous, first marriage (ref)               | 1.00                 |      |           | 1.00    |      |           |
|                               | Monogamous, first widowhood                    | 1.17                 | 0.01 | 1.15-1.19 | 1.16    | 0.01 | 1.14-1.18 |
|                               | Monogamous, remarried                          | 0.88                 | 0.01 | 0.86-0.90 | 0.89    | 0.01 | 0.87-0.92 |
|                               | Monogamous, widowed again                      | 1.09                 | 0.03 | 1.03-1.14 | 1.08    | 0.03 | 1.03-1.14 |
|                               | Polygamous, husband and all sister wives alive | 0.86                 | 0.03 | 0.80-0.92 | 0.85    | 0.03 | 0.79-0.92 |
|                               | Polygamous, some household members dead        | 0.99                 | 0.03 | 0.93-1.06 | 0.97    | 0.04 | 0.90-1.05 |
|                               | Polygamous, husband and all sister wives dead  | 1.24                 | 0.08 | 1.08-1.41 | 1.22    | 0.08 | 1.06-1.39 |
| Birth cohort                  | \$ <sub>i</sub> \$1800                         | 1.03                 | 0.04 | 0.95-1.11 | 0.98    | 0.04 | 0.90-1.06 |
|                               | 1800-1809                                      | 1.13                 | 0.04 | 1.05-1.21 | 1.06    | 0.04 | 0.98-1.14 |
|                               | 1810-1819                                      | 1.08                 | 0.03 | 1.03-1.14 | 1.03    | 0.03 | 0.98-1.09 |
|                               | 1820-1829                                      | 1.06                 | 0.02 | 1.02-1.11 | 1.07    | 0.02 | 1.02-1.12 |
|                               | 1830-1839                                      | 1.04                 | 0.02 | 1.00-1.07 | 1.09    | 0.02 | 1.05-1.13 |
|                               | 1840-1849                                      | 1.06                 | 0.02 | 1.02-1.09 | 1.12    | 0.02 | 1.08-1.16 |
|                               | 1850-1859                                      | 1.04                 | 0.01 | 1.01-1.06 | 1.06    | 0.01 | 1.04-1.09 |
|                               | 1860-1869                                      | 1.02                 | 0.01 | 1.00-1.04 | 1.03    | 0.01 | 1.00-1.05 |
|                               | 1870-1879                                      | 1.06                 | 0.01 | 1.03-1.08 | 1.05    | 0.01 | 1.03-1.07 |
|                               | 1880-1889 (ref)                                | 1.00                 |      |           | 1.00    |      |           |
|                               | 1890-1900                                      | 0.87                 | 0.01 | 0.85-0.88 | 0.87    | 0.01 | 0.85-0.88 |
|                               | Church affiliation                             | No affiliation (ref) | 1.00 |           |         | 1.00 |           |
| Inactive                      |                                                | 1.00                 | 0.01 | 0.98-1.03 | 1.00    | 0.01 | 0.98-1.02 |
| Active                        |                                                | 0.81                 | 0.01 | 0.80-0.82 | 0.83    | 0.01 | 0.82-0.85 |
| Biological parity             | 0 (ref)                                        |                      |      |           | 1.00    |      |           |
|                               | 1                                              |                      |      |           | 0.95    | 0.02 | 0.92-0.98 |
|                               | 2                                              |                      |      |           | 0.94    | 0.01 | 0.91-0.97 |
|                               | 3                                              |                      |      |           | 0.91    | 0.01 | 0.88-0.94 |
|                               | 4                                              |                      |      |           | 0.90    | 0.01 | 0.87-0.93 |
|                               | 5                                              |                      |      |           | 0.88    | 0.01 | 0.85-0.90 |
|                               | 6                                              |                      |      |           | 0.87    | 0.01 | 0.84-0.90 |
|                               | 7                                              |                      |      |           | 0.85    | 0.01 | 0.82-0.88 |
|                               | 8                                              |                      |      |           | 0.85    | 0.02 | 0.83-0.89 |
|                               | 9                                              |                      |      |           | 0.85    | 0.02 | 0.82-0.89 |
|                               | 10                                             |                      |      |           | 0.86    | 0.02 | 0.82-0.89 |
|                               | 11-14                                          |                      |      |           | 0.83    | 0.02 | 0.80-0.86 |
|                               | 15-19                                          |                      |      |           | 0.81    | 0.03 | 0.76-0.86 |
|                               | 20+                                            |                      |      |           | 0.81    | 0.04 | 0.74-0.89 |
|                               | Child deaths (ref)                             | 0                    |      |           |         | 1.00 |           |
| 1                             |                                                |                      |      |           | 1.06    | 0.01 | 1.04-1.08 |
| 2                             |                                                |                      |      |           | 1.10    | 0.01 | 1.07-1.12 |
| 3                             |                                                |                      |      |           | 1.12    | 0.02 | 1.09-1.15 |
| 4                             |                                                |                      |      |           | 1.11    | 0.02 | 1.08-1.16 |
| 5+                            |                                                |                      |      |           | 1.24    | 0.02 | 1.19-1.29 |
| Born outside of Utah          | No (ref)                                       |                      |      |           | 1.00    |      |           |
|                               | Yes                                            |                      |      |           | 0.92    | 0.01 | 0.91-0.93 |
| Nam-Powers occupational score | 1                                              |                      |      |           | 1.14    | 0.05 | 1.06-1.24 |
|                               | 2                                              |                      |      |           | 0.83    | 0.02 | 0.79-0.88 |
|                               | 3                                              |                      |      |           | 1.09    | 0.02 | 1.05-1.13 |
|                               | 4                                              |                      |      |           | 0.87    | 0.02 | 0.83-0.91 |
|                               | 5 (ref)                                        |                      |      |           | 0.89    | 0.02 | 0.86-0.92 |
|                               | 6                                              |                      |      |           | 1.00    |      |           |
|                               | 7                                              |                      |      |           | 0.85    | 0.02 | 0.82-0.88 |
|                               | 8                                              |                      |      |           | 0.81    | 0.01 | 0.78-0.84 |
|                               | 9                                              |                      |      |           | 0.78    | 0.02 | 0.75-0.81 |
|                               | 10                                             |                      |      |           | 0.77    | 0.02 | 0.73-0.81 |
|                               | Missing                                        |                      |      |           | 1.04    | 0.01 | 1.01-1.07 |
| Farmer                        | No (ref)                                       |                      |      |           | 1.00    |      |           |
|                               | Yes                                            |                      |      |           | 0.91    | 0.01 | 0.88-0.93 |
| N                             |                                                | 106,979              |      |           | 106,979 |      |           |
| Deaths                        |                                                | 103,079              |      |           | 103,079 |      |           |

Table S13: Multivariate estimates from Model 10 of mortality hazard for men using interaction between simplified marital status variable and number of child deaths

|                                                           |                                                            | Model 10 |           |           |
|-----------------------------------------------------------|------------------------------------------------------------|----------|-----------|-----------|
|                                                           |                                                            | HR       | SE        | 95% CI    |
| Child deaths x Marital status                             | 0 Deaths & Monogamous, first marriage (ref)                | 1.00     |           |           |
|                                                           | 0 Deaths & Monogamous, first widowhood                     | 1.15     | 0.01      | 1.12-1.18 |
|                                                           | 0 Deaths & Monogamous, remarried                           | 0.90     | 0.02      | 0.85-0.94 |
|                                                           | 0 Deaths & Monogamous, widowed again                       | 1.03     | 0.05      | 0.93-1.14 |
|                                                           | 0 Deaths & Polygamous, husband and all sister wives alive  | 0.70     | 0.09      | 0.55-0.90 |
|                                                           | 0 Deaths & Polygamous, some household members dead         | 0.93     | 0.15      | 0.68-1.27 |
|                                                           | 0 Deaths & Polygamous, husband and all sister wives dead   | 2.46     | 1.10      | 1.02-5.91 |
|                                                           | 1 Death & Monogamous, first marriage                       | 1.06     | 0.01      | 1.04-1.08 |
|                                                           | 1 Death & Monogamous, first widowhood                      | 1.22     | 0.02      | 1.19-1.25 |
|                                                           | 1 Death & Monogamous, remarried                            | 0.93     | 0.02      | 0.88-0.98 |
|                                                           | 1 Death & Monogamous, widowed again                        | 1.12     | 0.06      | 1.01-1.24 |
|                                                           | 1 Death & Polygamous, husband and all sister wives alive   | 0.77     | 0.08      | 0.63-0.95 |
|                                                           | 1 Death & Polygamous, some household members dead          | 0.84     | 0.10      | 0.66-1.06 |
|                                                           | 1 Death & Polygamous, husband and all sister wives dead    | 1.45     | 0.39      | 0.86-2.44 |
|                                                           | 2+ Deaths & Monogamous, first marriage                     | 1.10     | 0.01      | 1.07-1.12 |
|                                                           | 2+ Deaths & Monogamous, first widowhood                    | 1.30     | 0.02      | 1.27-1.34 |
|                                                           | 2+ Deaths & Monogamous, remarried                          | 0.99     | 0.02      | 0.95-1.04 |
|                                                           | 2+ Deaths & Monogamous, widowed again                      | 1.26     | 0.05      | 1.17-1.36 |
|                                                           | 2+ Deaths & Polygamous, husband and all sister wives alive | 0.99     | 0.04      | 0.91-1.09 |
|                                                           | 2+ Deaths & Polygamous, some household members dead        | 1.12     | 0.05      | 1.03-1.22 |
| 2+ Deaths & Polygamous, husband and all sister wives dead | 1.35                                                       | 0.10     | 1.17-1.56 |           |
| Birth cohort                                              | \$; \$1800                                                 | 0.98     | 0.04      | 0.90-1.06 |
|                                                           | 1800-1809                                                  | 1.06     | 0.04      | 0.99-1.14 |
|                                                           | 1810-1819                                                  | 1.04     | 0.03      | 0.98-1.10 |
|                                                           | 1820-1829                                                  | 1.08     | 0.02      | 1.03-1.13 |
|                                                           | 1830-1839                                                  | 1.09     | 0.02      | 1.05-1.14 |
|                                                           | 1840-1849                                                  | 1.12     | 0.02      | 1.09-1.16 |
|                                                           | 1850-1859                                                  | 1.07     | 0.01      | 1.04-1.09 |
|                                                           | 1860-1869                                                  | 1.03     | 0.01      | 1.01-1.05 |
|                                                           | 1870-1879                                                  | 1.05     | 0.01      | 1.03-1.07 |
|                                                           | 1880-1889 (ref)                                            | 1.00     |           |           |
| 1890-1900                                                 | 0.87                                                       | 0.01     | 0.85-0.88 |           |
| Church affiliation                                        | No affiliation (ref)                                       | 1.00     |           |           |
|                                                           | Inactive                                                   | 1.00     | 0.01      | 0.98-1.02 |
|                                                           | Active                                                     | 0.83     | 0.01      | 0.82-0.85 |
| Biological parity                                         | 0 (ref)                                                    | 1.00     |           |           |
|                                                           | 1                                                          | 0.95     | 0.02      | 0.92-0.98 |
|                                                           | 2                                                          | 0.94     | 0.01      | 0.91-0.97 |
|                                                           | 3                                                          | 0.91     | 0.01      | 0.88-0.94 |
|                                                           | 4                                                          | 0.90     | 0.01      | 0.87-0.92 |
|                                                           | 5                                                          | 0.87     | 0.01      | 0.85-0.90 |
|                                                           | 6                                                          | 0.87     | 0.01      | 0.84-0.90 |
|                                                           | 7                                                          | 0.84     | 0.01      | 0.82-0.87 |
|                                                           | 8                                                          | 0.85     | 0.02      | 0.82-0.89 |
|                                                           | 9                                                          | 0.86     | 0.02      | 0.82-0.89 |

Continued on next page

Table S13 – *Continued from previous page*

|                               |          | Model 10 |      |           |
|-------------------------------|----------|----------|------|-----------|
|                               |          | HR       | SE   | 95% CI    |
|                               | 10       | 0.86     | 0.02 | 0.83-0.90 |
|                               | 11-14    | 0.85     | 0.02 | 0.82-0.88 |
|                               | 15-19    | 0.83     | 0.03 | 0.78-0.88 |
|                               | 20+      | 0.85     | 0.04 | 0.77-0.93 |
| Born outside of Utah          | No (ref) | 1.00     |      |           |
|                               | Yes      | 0.92     | 0.01 | 0.91-0.94 |
| Nam-Powers occupational score | 1        | 1.14     | 0.05 | 1.06-1.24 |
|                               | 2        | 0.83     | 0.02 | 0.79-0.88 |
|                               | 3        | 1.09     | 0.02 | 1.05-1.13 |
|                               | 4        | 0.87     | 0.02 | 0.83-0.91 |
|                               | 5 ( ref) | 0.89     | 0.02 | 0.85-0.92 |
|                               | 6        | 1.00     |      |           |
|                               | 7        | 0.85     | 0.02 | 0.82-0.89 |
|                               | 8        | 0.81     | 0.01 | 0.78-0.84 |
|                               | 9        | 0.78     | 0.02 | 0.75-0.81 |
|                               | 10       | 0.77     | 0.02 | 0.73-0.81 |
|                               | Missing  | 1.04     | 0.01 | 1.01-1.07 |
| Farmer                        | No (ref) | 1.00     |      |           |
|                               | Yes      | 0.91     | 0.01 | 0.88-0.93 |
| N                             |          | 106,979  |      |           |
| Deaths                        |          | 103,079  |      |           |

Table S14: Multivariate estimates from Model 11 of mortality hazard for men using interaction between simplified marital status variable and number of children ever born

|                                                             |                                                             | Model 11 |           |            |
|-------------------------------------------------------------|-------------------------------------------------------------|----------|-----------|------------|
|                                                             |                                                             | HR       | SE        | 95% CI     |
| Parity x Marital status                                     | Parity 0 & Monogamous, first marriage (ref)                 | 1.00     |           |            |
|                                                             | Parity 0 & Monogamous, first widowhood                      | 1.08     | 0.03      | 1.03-1.14  |
|                                                             | Parity 0 & Monogamous, remarried                            | 0.81     | 0.06      | 0.69-0.94  |
|                                                             | Parity 0 & Monogamous, widowed again                        | 0.76     | 0.13      | 0.54-1.06  |
|                                                             | Parity 0 & Polygamous, husband and all sister wives alive   | 1.63     | 1.63      | 0.23-11.56 |
|                                                             | Parity 0 & Polygamous, some household members dead          | 0.29     | 0.29      | 0.04-2.04  |
|                                                             | Parity 0 & Polygamous, husband and all sister wives dead    |          |           |            |
|                                                             | Parity 1-3 & Monogamous, first marriage                     | 0.92     | 0.01      | 0.89-0.95  |
|                                                             | Parity 1-3 & Monogamous, first widowhood                    | 1.03     | 0.02      | 1.00-1.07  |
|                                                             | Parity 1-3 & Monogamous, remarried                          | 0.80     | 0.03      | 0.75-0.86  |
|                                                             | Parity 1-3 & Monogamous, widowed again                      | 0.94     | 0.07      | 0.82-1.08  |
|                                                             | Parity 1-3 & Polygamous, husband and all sister wives alive | 0.30     | 0.17      | 0.10-0.92  |
|                                                             | Parity 1-3 & Polygamous, some household members dead        | 0.86     | 0.86      | 0.12-6.12  |
|                                                             | Parity 1-3 & Polygamous, husband and all sister wives dead  |          |           |            |
|                                                             | Parity 4-6 & Monogamous, first marriage                     | 0.86     | 0.01      | 0.84-0.89  |
|                                                             | Parity 4-6 & Monogamous, first widowhood                    | 1.02     | 0.02      | 0.98-1.06  |
|                                                             | Parity 4-6 & Monogamous, remarried                          | 0.76     | 0.02      | 0.72-0.80  |
|                                                             | Parity 4-6 & Monogamous, widowed again                      | 0.92     | 0.05      | 0.83-1.01  |
|                                                             | Parity 4-6 & Polygamous, husband and all sister wives alive | 0.61     | 0.12      | 0.41-0.89  |
|                                                             | Parity 4-6 & Polygamous, some household members dead        | 0.70     | 0.20      | 0.40-1.24  |
|                                                             | Parity 4-6 & Polygamous, husband and all sister wives dead  | 1.62     | 0.66      | 0.72-3.61  |
|                                                             | Parity 7-9 & Monogamous, first marriage                     | 0.83     | 0.01      | 0.80-0.85  |
|                                                             | Parity 7-9 & Monogamous, first widowhood                    | 0.99     | 0.02      | 0.95-1.03  |
|                                                             | Parity 7-9 & Monogamous, remarried                          | 0.76     | 0.02      | 0.72-0.81  |
|                                                             | Parity 7-9 & Monogamous, widowed again                      | 0.99     | 0.05      | 0.90-1.10  |
|                                                             | Parity 7-9 & Polygamous, husband and all sister wives alive | 0.79     | 0.10      | 0.62-1.02  |
|                                                             | Parity 7-9 & Polygamous, some household members dead        | 0.72     | 0.11      | 0.53-0.97  |
|                                                             | Parity 7-9 & Polygamous, husband and all sister wives dead  | 1.02     | 0.30      | 0.58-1.80  |
|                                                             | Parity 10+ & Monogamous, first marriage                     | 0.82     | 0.02      | 0.79-0.85  |
|                                                             | Parity 10+ & Monogamous, first widowhood                    | 0.96     | 0.02      | 0.92-1.01  |
|                                                             | Parity 10+ & Monogamous, remarried                          | 0.75     | 0.02      | 0.70-0.79  |
| Parity 10+ & Monogamous, widowed again                      | 0.89                                                        | 0.05     | 0.81-0.99 |            |
| Parity 10+ & Polygamous, husband and all sister wives alive | 0.69                                                        | 0.03     | 0.64-0.75 |            |
| Parity 10+ & Polygamous, some household members dead        | 0.79                                                        | 0.03     | 0.74-0.85 |            |
| Parity 10+ & Polygamous, husband and all sister wives dead  | 0.97                                                        | 0.07     | 0.85-1.12 |            |
| Birth cohort                                                | <1800                                                       | 0.98     | 0.04      | 0.90-1.06  |
|                                                             | 1800-1809                                                   | 1.05     | 0.04      | 0.98-1.13  |
|                                                             | 1810-1819                                                   | 1.03     | 0.03      | 0.97-1.09  |
|                                                             | 1820-1829                                                   | 1.07     | 0.02      | 1.02-1.12  |
|                                                             | 1830-1839                                                   | 1.09     | 0.02      | 1.05-1.13  |
|                                                             | 1840-1849                                                   | 1.12     | 0.02      | 1.08-1.15  |
|                                                             | 1850-1859                                                   | 1.06     | 0.01      | 1.03-1.09  |
|                                                             | 1860-1869                                                   | 1.03     | 0.01      | 1.00-1.05  |
|                                                             | 1870-1879                                                   | 1.05     | 0.01      | 1.03-1.07  |
|                                                             | 1880-1889 (ref)                                             | 1.00     |           |            |

*Continued on next page*

Table S14 – *Continued from previous page*

|                               |                      | Model 11 |         |           |
|-------------------------------|----------------------|----------|---------|-----------|
|                               |                      | HR       | SE      | 95% CI    |
|                               | 1890-1900            | 0.87     | 0.01    | 0.85-0.88 |
| Church affiliation            | No affiliation (ref) | 1.00     |         |           |
|                               | Inactive             | 1.00     | 0.01    | 0.98-1.02 |
|                               | Active               | 0.83     | 0.01    | 0.82-0.85 |
| Child deaths (ref)            | 0                    | 1.00     |         |           |
|                               | 1                    | 1.06     | 0.01    | 1.04-1.07 |
|                               | 2                    | 1.09     | 0.01    | 1.07-1.11 |
|                               | 3                    | 1.11     | 0.02    | 1.08-1.14 |
|                               | 4                    | 1.10     | 0.02    | 1.07-1.14 |
|                               | 5+                   | 1.22     | 0.02    | 1.18-1.27 |
| Born outside of Utah          | No (ref)             | 1.00     |         |           |
|                               | Yes                  | 0.92     | 0.01    | 0.91-0.93 |
| Nam-Powers occupational score | 1                    | 1.14     | 0.05    | 1.06-1.24 |
|                               | 2                    | 0.83     | 0.02    | 0.79-0.88 |
|                               | 3                    | 1.09     | 0.02    | 1.05-1.13 |
|                               | 4                    | 0.87     | 0.02    | 0.83-0.91 |
|                               | 5 (ref)              | 0.89     | 0.02    | 0.86-0.92 |
|                               | 6                    | 1.00     |         |           |
|                               | 7                    | 0.85     | 0.02    | 0.82-0.89 |
|                               | 8                    | 0.81     | 0.01    | 0.78-0.84 |
|                               | 9                    | 0.78     | 0.02    | 0.75-0.81 |
|                               | 10                   | 0.77     | 0.02    | 0.73-0.81 |
|                               | Missing              | 1.04     | 0.01    | 1.01-1.07 |
| Farmer                        | No (ref)             | 1.00     |         |           |
|                               | Yes                  | 0.90     | 0.01    | 0.88-0.93 |
| N                             |                      |          | 106,979 |           |
| Deaths                        |                      |          | 103,079 |           |

Table S15: Multivariate estimates from Model 12 of mortality hazard for men using interaction between simplified marital status variable and farmer status

|                                                        |                                                               | Model 12 |           |           |
|--------------------------------------------------------|---------------------------------------------------------------|----------|-----------|-----------|
|                                                        |                                                               | HR       | SE        | 95% CI    |
| Farmer x Marital status                                | Not a Farmer & Monogamous, first marriage                     | 1.00     |           |           |
|                                                        | Not a Farmer & Monogamous, first widowhood                    | 1.12     | 0.01      | 1.10-1.14 |
|                                                        | Not a Farmer & Monogamous, remarried                          | 0.87     | 0.01      | 0.84-0.90 |
|                                                        | Not a Farmer & Monogamous, widowed again                      | 1.01     | 0.03      | 0.95-1.08 |
|                                                        | Not a Farmer & Polygamous, husband and all sister wives alive | 0.95     | 0.04      | 0.87-1.03 |
|                                                        | Not a Farmer & Polygamous, some household members dead        | 0.98     | 0.04      | 0.91-1.07 |
|                                                        | Not a Farmer & Polygamous, husband and all sister wives dead  | 1.22     | 0.10      | 1.03-1.44 |
|                                                        | Farmer & Monogamous, first marriage (ref)                     | 0.87     | 0.01      | 0.84-0.90 |
|                                                        | Farmer & Monogamous, first widowhood                          | 1.11     | 0.02      | 1.07-1.15 |
|                                                        | Farmer & Monogamous, remarried                                | 0.82     | 0.02      | 0.78-0.87 |
|                                                        | Farmer & Monogamous, widowed again                            | 1.09     | 0.05      | 0.99-1.19 |
|                                                        | Farmer & Polygamous, husband and all sister wives alive       | 0.52     | 0.04      | 0.44-0.61 |
|                                                        | Farmer & Polygamous, some household members dead              | 0.82     | 0.05      | 0.73-0.93 |
| Farmer & Polygamous, husband and all sister wives dead | 1.07                                                          | 0.12     | 0.86-1.33 |           |
| Birth cohort                                           | ;\$1800                                                       | 0.98     | 0.04      | 0.91-1.06 |
|                                                        | 1800-1809                                                     | 1.05     | 0.04      | 0.98-1.13 |
|                                                        | 1810-1819                                                     | 1.02     | 0.03      | 0.97-1.08 |
|                                                        | 1820-1829                                                     | 1.07     | 0.02      | 1.02-1.12 |
|                                                        | 1830-1839                                                     | 1.09     | 0.02      | 1.05-1.13 |
|                                                        | 1840-1849                                                     | 1.12     | 0.02      | 1.08-1.16 |
|                                                        | 1850-1859                                                     | 1.06     | 0.01      | 1.03-1.09 |
|                                                        | 1860-1869                                                     | 1.03     | 0.01      | 1.01-1.05 |
|                                                        | 1870-1879                                                     | 1.05     | 0.01      | 1.03-1.07 |
|                                                        | 1880-1889 (ref)                                               | 1.00     |           |           |
| 1890-1900                                              | 0.87                                                          | 0.01     | 0.85-0.88 |           |
| Church affiliation                                     | No affiliation (ref)                                          | 1.00     |           |           |
|                                                        | Inactive                                                      | 1.00     | 0.01      | 0.98-1.02 |
|                                                        | Active                                                        | 0.83     | 0.01      | 0.82-0.85 |
| Biological parity                                      | 0 (ref)                                                       | 1.00     |           |           |
|                                                        | 1                                                             | 0.95     | 0.02      | 0.92-0.98 |
|                                                        | 2                                                             | 0.94     | 0.01      | 0.91-0.97 |
|                                                        | 3                                                             | 0.91     | 0.01      | 0.88-0.94 |
|                                                        | 4                                                             | 0.90     | 0.01      | 0.87-0.92 |
|                                                        | 5                                                             | 0.88     | 0.01      | 0.85-0.90 |
|                                                        | 6                                                             | 0.87     | 0.01      | 0.84-0.90 |
|                                                        | 7                                                             | 0.85     | 0.01      | 0.82-0.87 |
|                                                        | 8                                                             | 0.85     | 0.02      | 0.82-0.89 |
|                                                        | 9                                                             | 0.85     | 0.02      | 0.82-0.89 |
|                                                        | 10                                                            | 0.86     | 0.02      | 0.82-0.89 |
|                                                        | 11-14                                                         | 0.83     | 0.02      | 0.80-0.86 |
|                                                        | 15-19                                                         | 0.81     | 0.03      | 0.76-0.86 |
|                                                        | 20+                                                           | 0.81     | 0.04      | 0.74-0.89 |
| Child deaths (ref)                                     | 0                                                             | 1.00     |           |           |
|                                                        | 1                                                             | 1.06     | 0.01      | 1.04-1.08 |
|                                                        | 2                                                             | 1.09     | 0.01      | 1.07-1.12 |

*Continued on next page*



Table S15 – *Continued from previous page*

|                      |          | Model 12 |      |           |
|----------------------|----------|----------|------|-----------|
|                      |          | HR       | SE   | 95% CI    |
|                      | 3        | 1.12     | 0.02 | 1.09-1.15 |
|                      | 4        | 1.11     | 0.02 | 1.07-1.15 |
|                      | 5+       | 1.24     | 0.02 | 1.19-1.28 |
| Born outside of Utah | No (ref) | 1.00     |      |           |
|                      | Yes      | 0.92     | 0.01 | 0.91-0.94 |
| Nam-Powers           | 1        | 1.14     | 0.05 | 1.06-1.24 |
| occupational score   | 2        | 0.83     | 0.02 | 0.79-0.88 |
|                      | 3        | 1.09     | 0.02 | 1.05-1.13 |
|                      | 4        | 0.87     | 0.02 | 0.83-0.91 |
|                      | 5 ( ref) | 0.89     | 0.02 | 0.86-0.92 |
|                      | 6        | 1.00     |      |           |
|                      | 7        | 0.85     | 0.02 | 0.82-0.88 |
|                      | 8        | 0.81     | 0.01 | 0.78-0.84 |
|                      | 9        | 0.78     | 0.02 | 0.75-0.81 |
|                      | 10       | 0.77     | 0.02 | 0.73-0.81 |
|                      | Missing  | 1.04     | 0.01 | 1.01-1.07 |
| N                    |          | 106,979  |      |           |
| Deaths               |          | 103,079  |      |           |
